# Supplementary material for: Widespread intron retention in mammals functionally tunes transcriptomes
Source: HighWire-hosted journal article supplement (doi:10.1101/gr.177790.114), 2014-09-25
Supplement: TableS1_Samples_IR_UB140701.xlsx [file TableS1_Samples_IR_UB140701.xlsx]

## Sheet: Human
RNA-seq HUMAN
Type	#	Sample	Label	Method	Read-Length	Read #	Source (SRA)	Reference/GEO
ESC	1	ESC_H1_a	ESC_H1a	Illumina	75,75PE	112504744	SRR065492,3; SRR065504; SRR065526; SRR066678	GSM591680, GSM591658
	2	ESC_H1_b	ESC_H1cd	Illumina	50	268177375	SRR031628-34; SRR307911,2	PMID: 20944595, GSM758566
	3	ESC_H1_c	ESC_H1e	Illumina	101PE	202255240	SRR488684	GSM915328
	4	ESC_H1_d	ESC_H1f	Illumina	101PE	211806326	SRR488685	GSM915329
	5	ESC_H9_a	ESC_H9ac	Illumina	50	118572472	SRR345211-3; SRR067388-90	PMID: 21924763, PMID: 21324177
	6	ESC_H9_b	ESC_H9d	Illumina	50	178391229	SRR529646,7;SRR529646; SRR529647	GSM978785
	7	ESC_HES2	ESC_HES2	SOLiD	75	270903690	SRR094594-600	PMID: 22042643
iPS	8	iPS_a	iPSac	Illumina	50	356027112	SRR350717; SRR597912	PMID: 21915259, GSM1023087
	9	iPS_b	iPSd	Illumina	101PE	223517149	SRR597895	PMID: 23160490
Precursors	10	PREC_NPC_a	PREC_NPC_f	Illumina	101PE	131236172	SRR447182-7	PMID: 22730494
	11	PREC_NPC_b	PREC_NPC_cont	Illumina	101PE	129585583	SRR447172-6	PMID: 22730494
	12	PREC_HFDPC	PREC_HFDPC	Illumina	101PE	282429201	SRR534326,7	GSM981258
	13	PREC_MSC	PREC_MSCab	Illumina	50	284068325	SRR534335, SRR545691	GSM981260, GSM984607
	14	PIacentaEpithelialCells	PlacentaEpiC_M	Illumina	101PE	314765710	SRR545685,6	GSM984604
Transf Lines	15	CL_PNT2	CL_PNT2_ESRP_Cont	Illumina	76	59124618	SRR436884	PMID: 22354987
	16	CL_Gm12878	CL_Gm12878	Illumina	75PE	212225782	SRR521447-56	GSM958728
	17	CL_K562	CL_K562	Illumina	75PE	219833510	SRR521457-65	GSM958729
	18	CL_HeLa	CL_HeLa_cont	Illumina	75PE	85935538	SRR797056	PMID: 23739326
	19	CL_293T	CL_293T_cont	Illumina	75PE	67568978	SRR797054	PMID: 23739326
	20	CL_MB231	CL_MB231_ESRP_Cont	Illumina	76	120901583	SRR436886	PMID: 22354987
	21	CL_SKNSH-RA	CL_Neurobl_RA	Illumina	76PE	78993876	SRR315315,6	GSM765395
Dif Lines	22	Melanocytes	Melanocytes	Illumina	101PE	145680982	SRR545714	GSM984616
	23	Fibroblast_a	Fibr_M	Illumina	50	257390785	SRR309267-70, pending	PMID: 21890647
Tissues	24	Adipose_Breast	Adipose_Breast	Illumina	50PE,75	306626772	ERR030880,8; ERR030883,91	Human BodyMap2
	25	Adrenal	Adrenal	Illumina	50PE,75	150644440	ERR030881,9	Human BodyMap2
	26	Amnion	Amnion	Illumina	54PE,72PE	50594744	SRR635193,8932	PMID:22448651
	27	Brain	Brain	Illumina	50PE,75	137826251	ERR030882,90	Human BodyMap2
	28	Brain_STG	Brain_STG	Illumina	75,76	186300000	ERR103421,5-9	PMID:22558445
	29	Cerebellum	Cerebellum_M	Illumina	50	193627224	SRR306844-6; SRR111935-7,2601,2673,5	PMID: 22012392, PMID: 23340839
	30	Chorion	Chorion	Illumina	54PE,72PE	60425049	SRR638936,41	PMID:22448651
	31	Colon	Colon	Illumina	50PE,75	162695200	ERR030884,92	Human BodyMap2
	32	Cortex	Brain_Cortex_M	Illumina	50	307459135	SRR306838-43; pending; pending	PMID: 22012392, NA, NA
	33	Decidua	Decidua	Illumina	54PE,72PE	58062022	SRR638937,9	PMID:22448651
	34	EndomStromalCells	EndomStromalC_M	Illumina	50	65753473	SRR309129;SRR309128	GSM761683; GSM761684
	35	Endothelium	Endothelium	Illumina	101PE	310617653	SRR545718; SRR545707	GSM984618, GSM984613
	36	EpithelialCells	EpithelialCells	Illumina	101PE	146844047	SRR545723	GSM984621
	37	FrontalGyrus_old	Brain_FrGyrus_o	Illumina	76PE,100	216122751	SRR090441,2,SRR111901,SRR112672,4	PMID: 23340839
	38	FrontalGyrus_young	Brain_FrGyrus_y	Illumina	76PE,100	194915013	SRR090440,SRR107727,SRR112600,SRR111895-900	PMID: 23340839
	39	GLS_cells	GLS_cells_M	Illumina	50	323856395	SRR577579-83; SRR577583-6; SRR577599-603	GSM1010946, GSM1010960, GSM1010976
	40	Heart	Heart_M	Illumina	50PE,75,76	239907914	ERR030886,94; SRR306847-50	Human BodyMap2, PMID: 22012392
	41	Kidney	Kidney_M	Illumina	50PE,75,76	234734619	ERR030885,93; SRR306851-3	Human BodyMap2, PMID: 22012392
	42	Liver	Liver_M	Illumina	50PE,58,75,76	433730231	ERR030887,95; SRR306854-6;SRR087756-8,63-9	Human BodyMap2, PMID: 22012392, GSM641421
	43	Lung	Lung	Illumina	50PE,75	160552343	ERR030879,96	Human BodyMap2
	44	Lymph node	LymphNode	Illumina	50PE,75	163994617	ERR030878,97	Human BodyMap2
	45	Muscle	Muscle	Illumina	50PE,75	164975775	ERR030876,99	Human BodyMap2
	46	Muscle_b	Muscle_c	Illumina	50	285315565	SRR087770-6; SRR087777-81,94946,7	GSM641425
	47	Ovary	Ovary	Illumina	50PE,75	161949312	ERR030874,901	Human BodyMap2
	48	Placenta	Placenta	Illumina	76PE	30024380	SRR309266	GSM759889
	49	Prostate	Prostate	Illumina	50PE,75	165653978	ERR030877,98	Human BodyMap2
	50	Testis	Testis_M	Illumina	50PE,75,76	205549381	ERR030873,903; SRR306857,8	Human BodyMap2, PMID: 22012392
	51	Thyroid	Thyroid	Illumina	50PE,75	162159544	ERR030972,903	Human BodyMap2
	52	WhiteBloodCells	WBC_MC	Illumina	50PE,75,PE101	373025934	ERR030875,900; SRR545690	Human BodyMap2, GSM984606

## Sheet: Mouse
RNA-seq MOUSE
Type	#	Sample	Label	Method	Read-Length	Read #	Source (SRA)	Reference/GEO
ESC	1	ESC_v65	ESC_v65	Illumina	76PE	58065395	SRR039999-40001	PMID: 20436462
	2	ESC_OS25_TT2	ESC_OS25_TT2	Illumina	50	119715160	SRR391029-31; SRR210855; SRR449479	PMID: 22305566,PMID: 21624812, GSM905089
	3	ESC_J1	ESC_J1	Illumina	79PE	43040267	SRR210861	PMID: 21624812
	4	ESC_E14	ESC_E14_M	Illumina	50	464596307	SRR185887; SRR315594; SRR414942,3; SRR530639,40	GSM706680, GSM765288, GSM881355, GSM973235
	5	ESC_D3	ESC_D3	Illumina	76PE	62345902	SRR331051,3	PMID: 21884934
	6	ESC_CGR8	ESC_CGR8	Illumina	101PE	234225906	SRR797058	PMID: 23739326
TSC	7	TrophoblastSC	TSb	Illumina	35	130500000	SRR522252-63	GSM967642
iPS	8	iPS_b	iPSb	Illumina	101PE	47314841	SRR611677	PMID: 23217423
	9	iPS_a	iPS_ad	Illumina	50	54846353	SRR611665, SRR611683	PMID: 23217423
Precursors	10	NPC_a	PREC_NPCa	Illumina	70PE	60027994	SRR040004,5	GSM521651,2
	11	NPC_b	PREC_NPCb	Illumina	35,38	64120336	DRR000589,93,1179	PMID: 23072808
	12	PGC_E9_E11dpc	PGC_E9_E11dpc	Illumina	50	143692247	SRR648686-97	PMID: 23151479
	13	PGC_E13dpc	PGC_E13dpc	Illumina	50	233175521	SRR609722-30,35-43	PMID: 23151479
	14	proB_T_cells	pB_T_cells	Illumina	36	421999648	SRR499674,5; SRR499676,7; SRR499678-80,85-90; SRR210844-8	PMID: 21765417
Embryonic	15	Oocyte	Oocyte_M	Illumina + SOLiD	50	197390427	SRR385625-7; SRR057540,1	GSM838743, PMID: 21731673
(EMBR)	16	Embr_2C	Embr_2C_M	Illumina + SOLiD	50	404648419	SRR385622-4; SRR057544-51	GSM838742, PMID: 21731673
	17	Embr_4C	Embr_4C	SOLiD	50	162600000	SRR057552-7	PMID: 21731673
	18	Embr_8C	Embr_8C	SOLiD	50	150000000	SRR057558-63	PMID: 21731673
	19	PREC_VZ	PREC_VZ	Illumina	76	105800000	SRR314802,3,8,9	GSM763485
	20	Embr_Limb_14dpc	Embr_Limb_14dpc	Illumina	101PE	170903264	SRR567490	GSM1000568
	21	Embr_Liver_14dpc	Embr_Liver_14dpc	Illumina	101PE	156381988	SRR567496	GSM1000571
	22	Embr_CNS_14dpc	Embr_Brain_CNS_14dpc	Illumina	101PE	221581975	SRR567493	GSM1000569
	23	Embr_CNS_11dpc	Embr_Brain_CNS_11dpc	Illumina	101PE	204144434	SRR567500	GSM1000573
	24	Embr_Brain_Cortex_E17	Embr_Brain_Cortex_E17	Illumina	80	192636161	SRR531311-4	PMID: 23416452
Transf Lines	25	CL_N2A_a	CL_N2A	Illumina	36	106434928	available upon request: mirimia@gmail.com	PMID: 23739326
(CL)	26	CL_N2A_b	N2A_cont	Illumina	88	179551740	Pending	NA
	27	CL_3T3	CL_3T3	Illumina	36	133878952	SRR149235-7; SRR149707-9; SRR390297	PMID: 21593866
	28	CL_CH12	CL_CH12	Illumina	101PE	279000000	SRR530637,8	GSM973234
	29	CL_MEL	CL_MEL	Illumina	101PE	150000000	SRR530633,4	GSM973232
Dif Lines	30	MEF_a	MEFa	Illumina	50	55325338	SRR611704	PMID: 23217423
	31	MEF_b	MEF_bc	Illumina	50	64371704	SRR611705; SRR611706	PMID: 23217423
	32	C2C12_a	Myoblm24h	Illumina	76PE	42184539	SRR037945,6	PMID: 20436464
	33	C2C12_b	C2C12_cont	Illumina	36	34984510	SRR533644	PMID: 22901804
	34	Myoblast_60h	Myobl60h	Illumina	76PE	70192031	SRR037947-9	GSM521257
	35	Myoblast_120h	Myobl120h	Illumina	76PE	41069106	SRR037950,1
	36	Myoblast_168h	Myobl168h	Illumina	76PE	61787833	SRR037952-4	GSM521259
Tissues	37	Adrenal	AdrenalE	Illumina	76PE	148300000	SRR453116-21	GSM900188
	38	Bladder	BladderE	Illumina	101PE	161644204	SRR567482	GSM1000564
	39	Brain_a	Brain_BNP	Illumina	50	334203340	SRR579545,6; SRR306757-62; SRR533617-21	PMID: 23258890, PMID: 22012392, PMID: 22901804
	40	Brain_b	Brain_B12	Illumina	50	206088957	SRR594393; SRR594402	PMID: 23258891
	41	Brain_Cortex	Brain_Cortex_b	Illumina	80	122763681	SRR531315-7	PMID: 23416452
	42	Brain_FrontalLobe	Brain_FrontalLobe	Illumina	101PE	185745131	SRR567478	GSM1000562
	43	Cerebellum	Cerebellum_EP	Illumina	50	241973575	SRR306763-5; SRR567488	PMID: 22012392, GSM1000567
	44	Colon	Colon_M	Illumina	50	320269578	SRR453166-71; SRR594394; SRR594403	GSM900198; PMID: 23258891
	45	FatPad_MammGland	FatPad_MammGland	Illumina	50	452200000	SRR453130-3; SRR453087-92; SRR453126-9	GSM900191, GSM900184, GSM900190
	46	Heart_a	Heart_BNP	Illumina	50	227602900	SRR579549; SRR306766-8; SRR533627-33	PMID: 23258890, PMID: 22012392, PMID: 22901804
	47	Heart_b	HeartE	Illumina	76PE	155581190	SRR453172-5	GSM900199
	48	Intestine	Intestine_M	Illumina	50	442600000	SRR453122-5; SRR453109-15; SRR453099-108	GSM900189, GSM900187, GSM900186
	49	Kidney_a	Kidney_ENP	Illumina	50	351693811	SRR453144-9; SRR579548; SRR306769-71	GSM900194, PMID: 23258890, PMID: 22012392
	50	Kidney_b	Kidney_B12	Illumina	50	238159976	SRR594396; SRR594404	PMID: 23258891
	51	Liver_a	Liver_ENP	Illumina	50	331685760	SRR453150-5; SRR579547; SRR306772-4	GSM900195, PMID: 23258890, PMID: 22012392
	52	Liver_b	Liver_B12	Illumina	50	250338199	SRR594397; SRR594405	PMID: 23258891
	53	Lung	Lung_M	Illumina	50	195429060	SRR453156-9; SRR594406	GSM900196, PMID: 23258891
	54	Muscle_a	Muscle_BN	Illumina	50	130832927	SRR579550; SRR533639-43	PMID: 23258890; PMID: 22901804
	55	Muscle_b	Muscle_B12	Illumina	50	230283014	SRR594399; SRR594407	PMID: 23258891
	56	Neurons	Neurons_M	Illumina	50	200276139	SRR359852-7; SRR359858-61	PMID: 22272348
	57	Ovary	OvaryE	Illumina	76PE	105700000	SRR453077-86	GSM900183
	58	Placenta_a	PlacentaE	Illumina	101PE	237925260	SRR567485	GSM1000565
	59	Placenta_b	Placenta	Illumina	36	129406737	SRR243586-602	PMID: 21705755
	60	Retina_Eye	Retina_Eye	Illumina	50	376268856	SRR327045,7; SRR342457,8; SRR504764-72	PMID: 21775302, GSM945636
	61	Spleen	Spleen_M	Illumina	50	381480695	SRR453160-5; SRR594400; SRR594408	GSM900197; PMID: 23258891
	62	Stomach	StomachE	Illumina	76PE	168600000	SRR453093-8	GSM900185
	63	Testis_a	Testis_EP	Illumina	50	200536678	SRR306775-6; SRR453140-3	PMID: 22012392, GSM900193
	64	Testis_b	Testis_B12	Illumina	50	225725085	SRR594401;SRR594409	PMID: 23258891
	65	Thymus	ThymusE	Illumina	76PE	181600000	SRR453134-9	GSM900192

## Sheet: 11 vertebrate tissues
RNA-seq of brain, cerebellum, heart, muscle, liver, kidney, and testis from 11 vertebrate species
(cross-species analysis)
For details, refer to Barbosa Morais et al., Science (2012), Supplemental Table S5
Source (SRA/ArrayExpress)	Reference/GEO
MTAB-513	Illumina Bodymap 2.0
SRP007412	PMID: 22012392
SRP015997	PMID: 23258890

## Sheet: Special
RNA-seq SPECIAL SAMPLES
Type	Organism	Sample	Method	Read-Length	Read #	Source (SRA)	Reference/GEO
Subcellular fractionation	Human	K562 nucleus long polyA	Illumina	76PE	73909358	SRR315299,300	GSM765387
	Human	K562 cytosol long polyA	Illumina	76PE	213271407	SRR387661,2	GSM840137
	Human	H1-hESC nucleus long polyA	Illumina	76PE	34445333	SRR307925	GSM758574
	Human	H1-hESC cytosol long polyA	Illumina	76PE	32644642	SRR307919	GSM758570
	Human	HeLa-S3 nucleus long polyA	Illumina	76PE	61181585	SRR315332,3	GSM765403
	Human	HeLa-S3 cytosol long polyA	Illumina	76PE	73087680	SRR315334,5	GSM765404
Smg1 gene trap allele	Mouse	MEF wild type	Illumina	50		available upon request	PMID: 20566848
	Mouse	MEF Smg[gt]gt]	Illumina	50		available upon request	PMID: 20566848
Neuronal differentiation	Mouse	ESC_DIVm8	Illumina	50PE	120602506	SRR645824,6,8,30	PMID: 24358889
	Mouse	NeuroepithCells_DIVm4	Illumina	50PE	76130047	SRR645833,5,7	PMID: 24358889
	Mouse	RadialGlia_DIV0	Illumina	50PE	104316536	SRR645840,2,4	PMID: 24358889
	Mouse	Neurons_stI_II_DIV1	Illumina	50PE	142278199	SRR645930,2,4,6092	PMID: 24358889
	Mouse	Neurons_stII_IV_DIV7	Illumina	50PE	181980954	SRR645846,9,51,3,6182	PMID: 24358889
	Mouse	Neurons_stIV_V_DIV28	Illumina	50PE	120482892	SRR645872,5,7,9	PMID: 24358889
SmB knockdown in HeLa	Human	siSmB in HeLa	Illumina	50PE	51020424	SRR094184-7	PMID: 21325135
	Human	siNT in HeLa	Illumina	50PE	26778570	SRR094181-3	PMID: 21325135
