# Supplementary material for: Widespread intron retention in mammals functionally tunes transcriptomes
Source: HighWire-hosted journal article supplement (doi:10.1101/gr.177790.114), 2014-09-25
Supplement: TableS2_LogisticModel.xlsx [file TableS2_LogisticModel.xlsx]

## Sheet: Sheet1
Supplemental Table S2: Logistic regression model of IR in pooled human neural samples
		Complete logistic model		Reduced logistic model		KS-test
		AUC=0.79		AUC=0.76
Description	Feature	-log10(pval)	Coefficient	-log10(pval)	Coefficient	-log10(P-val)	KS statistic
intron length	i_len	4.498	-0.16	15.718	-0.336	307.653	0.192
upstream exon length	e1_len	0.411	0.013	1.387	-0.028	14.909	0.036
downstream exon length	e2_len	1.532	-0.029	1.157	-0.018	110.887	0.096
relative intron rank	rel_i_rank	124.333	0.304	148.031	0.321	307.653	0.169
is first intron	first_intron	11.307	0.594	3.721	0.293	32.54	0.052
is last intron	last_intron	3.445	0.318	5.029	0.381	212.913	0.133
is middle intron	middle_intron	4.391	-0.362	8.075	-0.484	313.142	0.161
relative length intron/up. exon	rel_len_ie1	0.532	0.023	3.291	0.077	307.653	0.187
relative length intron/down. exon	rel_len_ie2	0.526	-0.035	0.579	-0.041	307.653	0.22
relative length up./down. exon	rel_len_e1e2	5.125	0.069	10.071	0.091	106.344	0.094
relative log length intron/up. exon	re_loglen_ie1	1.048	-53544.4			307.653	0.187
relative log length intron./down. exon	re_loglen_ie2	1.048	58375.3			307.653	0.22
relative log length up./down. exon	re_loglen_e1e2	1.048	-30662.2			106.344	0.094
splice donor maximum entropy score	ss5_maxent	209.133	-0.314	116.435	-0.201	126.566	0.103
splice acceptor maximum entropy score	ss3_maxent	141.26	-0.292	164.06	-0.246	64.439	0.073
contains a premature termination codon	PTC	10.358	0.354	13.282	0.391	110.163	0.096
is within a UTR	UTR	30.356	1.272	38.748	1.392	78.989	0.081
intron dinucleotide contents	I_AA	0.214	-138.639			307.653	0.263
	I_AC	0.173	-35.717			57.538	0.069
	I_AG	0.123	-39.492			254.427	0.145
	I_AT	0.235	-124.755			307.653	0.306
	I_CA	0.288	-73.52			146.494	0.11
	I_CC	0.243	-185.593			307.653	0.278
	I_CG	0.188	-52.451			307.653	0.193
	I_CT	0.31	-99.118			307.653	0.174
	I_GA	0.348	-85.363			104.416	0.093
	I_GC	0.3	-120.55			307.653	0.25
	I_GG	0.243	-185.081			307.653	0.271
	I_GT	0.373	-79.223			107.043	0.094
	I_TA	0.194	-107.57			307.653	0.304
	I_TC	0.153	-46.712			171.476	0.119
	I_TG	0.105	-33.134			112.65	0.097
	I_TT	0.214	-180.746			307.653	0.293
upstream exon dinucleotide contents	E1_AA	0.181	-139.959			307.653	0.21
	E1_AC	0.181	-60.133			9.635	0.029
	E1_AG	0.181	-81.321			13.579	0.034
	E1_AT	0.181	-82.424			307.653	0.213
	E1_CA	0.182	-71.671			4.32	0.02
	E1_CC	0.182	-116.687			307.653	0.201
	E1_CG	0.182	-84.86			251.187	0.144
	E1_CT	0.182	-70.557			185.487	0.124
	E1_GA	0.183	-81.448			168.069	0.118
	E1_GC	0.182	-98.944			307.653	0.191
	E1_GG	0.182	-104.717			320.241	0.163
	E1_GT	0.182	-57.6			0.114	0.006
	E1_TA	0.18	-65.43			307.653	0.179
	E1_TC	0.181	-65.058			22.458	0.043
	E1_TG	0.18	-73.237			4.656	0.02
	E1_TT	0.181	-100.276			261.26	0.147
downstream exon dinucleotide contents	E2_AA	0.438	284.739			307.653	0.204
	E2_AC	0.438	120.793			20.67	0.042
	E2_AG	0.439	166.948			33.818	0.053
	E2_AT	0.438	166.263			307.653	0.207
	E2_CA	0.438	141.233			2.781	0.016
	E2_CC	0.438	232.365			307.653	0.212
	E2_CG	0.437	127.796			182.951	0.123
	E2_CT	0.438	143.22			242.931	0.142
	E2_GA	0.437	164.96			259.838	0.147
	E2_GC	0.437	174.708			307.653	0.182
	E2_GG	0.438	192.571			312.097	0.161
	E2_GT	0.437	116.643			2.432	0.015
	E2_TA	0.439	140.322			308.879	0.16
	E2_TC	0.438	132.142			37.106	0.056
	E2_TG	0.438	147.776			2.097	0.014
	E2_TT	0.439	214.088			174.59	0.12
dinuc. contents in first 300 bp of intron	I5p_AA	0.563	396.404			307.653	0.227
	I5p_AC	0.468	119.923			10.432	0.03
	I5p_AG	0.468	170.241			152.031	0.112
	I5p_AT	0.565	331.029			307.653	0.263
	I5p_CA	0.564	180.769			94.053	0.088
	I5p_CC	0.468	393.692			307.653	0.239
	I5p_CG	0.468	188.922			307.653	0.179
	I5p_CT	0.565	217.419			178.623	0.122
	I5p_GA	0.564	177.206			62.223	0.072
	I5p_GC	0.467	240.508			307.653	0.214
	I5p_GG	0.467	416.21			307.653	0.224
	I5p_GT	0.565	161.625			56.056	0.068
	I5p_TA	0.562	337.589			307.653	0.266
	I5p_TC	0.466	165.968			75.43	0.079
	I5p_TG	0.466	167.644			34.32	0.054
	I5p_TT	0.563	516.636			307.653	0.256
dinuc. contents in last 300 bp of intron	I3p_AA	0.774	-499.338			307.653	0.248
	I3p_AC	0.773	-167.557			11.042	0.031
	I3p_AG	0.772	-241.764			164.759	0.117
	I3p_AT	0.773	-411.969			307.653	0.285
	I3p_CA	0.62	-185.926			115.618	0.098
	I3p_CC	0.62	-475.688			307.653	0.258
	I3p_CG	0.619	-156.726			307.653	0.187
	I3p_CT	0.619	-233.34			267.508	0.149
	I3p_GA	0.621	-184.77			51.304	0.065
	I3p_GC	0.621	-267.075			307.653	0.236
	I3p_GG	0.62	-463.956			307.653	0.251
	I3p_GT	0.62	-169.59			26.349	0.047
	I3p_TA	0.775	-422.961			307.653	0.284
	I3p_TC	0.774	-238.727			106.542	0.094
	I3p_TG	0.773	-237.085			50.524	0.065
	I3p_TT	0.774	-669.364			307.653	0.28
dinuc. contents in 5'-ss (20 bp intron, 10 bp exon)	J5p_AA	1.719	1569.87			269.775	0.15
	J5p_AC	1.719	781.299			1.762	0.013
	J5p_AG	1.719	977.494			12.771	0.033
	J5p_AT	1.719	1025.07			307.653	0.167
	J5p_CA	1.719	913.271			10.002	0.029
	J5p_CC	1.719	1347.26			238.214	0.141
	J5p_CG	1.719	757.024			183.505	0.124
	J5p_CT	1.719	904.053			15.514	0.036
	J5p_GA	1.719	957.861			10.36	0.03
	J5p_GC	1.719	997.192			230.503	0.138
	J5p_GG	1.719	1599.49			263.352	0.148
	J5p_GT	1.719	847.843			8.129	0.026
	J5p_TA	1.719	1079.95			307.653	0.184
	J5p_TC	1.719	862.607			1.847	0.013
	J5p_TG	1.719	1046.42			19.725	0.041
	J5p_TT	1.719	1624.69			307.653	0.168
dinuc. contents in 3'-ss (20 bp intron, 10 bp exon)	J3p_AA	1.951	-1233.46			145.349	0.11
	J3p_AC	1.95	-839.655			25.839	0.047
	J3p_AG	1.95	-660.537			19.501	0.041
	J3p_AT	1.951	-1097.25			275.44	0.151
	J3p_CA	1.951	-978.588			71.185	0.077
	J3p_CC	1.95	-1947.15			307.653	0.198
	J3p_CG	1.95	-566.291			116.567	0.098
	J3p_CT	1.95	-1276.14			86.24	0.085
	J3p_GA	1.95	-821.133			5.948	0.023
	J3p_GC	1.95	-974.592			255.892	0.146
	J3p_GG	1.95	-1017.99			74.15	0.079
	J3p_GT	1.95	-1016.98			1.928	0.014
	J3p_TA	1.951	-1084.31			319.191	0.163
	J3p_TC	1.951	-1228.62			28.798	0.049
	J3p_TG	1.951	-1118.98			6.535	0.024
	J3p_TT	1.951	-2621.75			307.653	0.245
content of G/C in intron	I_G/C	31.244	50.185	66.722	0.284	307.653	0.314
content of G/C in upstream exon	E1_G/C	7.077	1.787	3.409	0.059	307.653	0.249
content of G/C in downstream exon	E2_G/C	2.121	0.854	16.478	0.13	307.653	0.238
content of G/C in first 300bp of intron	I5p_G/C	19.809	165.199			307.653	0.285
content of G/C in last 300bp of intron	I3p_G/C	36.21	-223.788			307.653	0.303
content of G/C in 5'-ss (20 bp intron, 10 bp exon)	J5p_G/C	0.947	0.201	1.615	0.037	307.653	0.243
content of G/C in 3'-ss (20 bp intron, 10 bp exon)	J3p_G/C	3.411	-0.419	46.412	0.219	307.653	0.259
