# Supplementary material for: Widespread intron retention in mammals functionally tunes transcriptomes
Source: HighWire-hosted journal article supplement (doi:10.1101/gr.177790.114), 2014-09-25
Supplement: TableS3_GOterms.xlsx [file TableS3_GOterms.xlsx]

## Sheet: Sheet1
GO categories in full GO table found with the following search terms:
Neural	(brain OR retina OR synapse) AND NOT immuno
Muscle	muscle OR myo OR sarco OR contractile
Stem cell	stem cell
Fibroblast	fibroblast
'geneFoundHuman' and 'geneFoundMouse' indicate GO categories that were actually found as annotations for genes containing the introns in the study.
Label	GO	Name	geneFoundHuman	geneFoundMouse
Neural	GO:0001758	retinal dehydrogenase activity	TRUE	TRUE
Neural	GO:0001895	retina homeostasis	TRUE	TRUE
Neural	GO:0002035	brain renin-angiotensin system	FALSE	TRUE
Neural	GO:0002383	immune response in brain or nervous system	FALSE	FALSE
Neural	GO:0003360	brainstem development	TRUE	TRUE
Neural	GO:0003361	noradrenergic neuron differentiation involved in brainstem development	FALSE	FALSE
Neural	GO:0003362	noradrenergic neuron fate commitment involved in brainstem development	FALSE	FALSE
Neural	GO:0003406	retinal pigment epithelium development	FALSE	TRUE
Neural	GO:0003407	neural retina development	FALSE	TRUE
Neural	GO:0004744	retinal isomerase activity	FALSE	FALSE
Neural	GO:0005502	11-cis retinal binding	FALSE	TRUE
Neural	GO:0005503	all-trans retinal binding	FALSE	TRUE
Neural	GO:0007273	regulation of synapse	FALSE	FALSE
Neural	GO:0007416	synapse assembly	TRUE	TRUE
Neural	GO:0007420	brain development	TRUE	TRUE
Neural	GO:0009998	negative regulation of retinal cone cell fate specification	FALSE	FALSE
Neural	GO:0010842	retina layer formation	TRUE	TRUE
Neural	GO:0014045	establishment of endothelial blood-brain barrier	FALSE	TRUE
Neural	GO:0016527	brain-specific angiogenesis inhibitor activity	FALSE	FALSE
Neural	GO:0016918	retinal binding	TRUE	TRUE
Neural	GO:0018273	protein-chromophore linkage via peptidyl-N6-retinal-L-lysine	FALSE	FALSE
Neural	GO:0019931	protein-chromophore linkage via peptidyl-N6-3-dehydroretinal-L-lysine	FALSE	FALSE
Neural	GO:0021533	cell differentiation in hindbrain	TRUE	TRUE
Neural	GO:0021534	cell proliferation in hindbrain	TRUE	FALSE
Neural	GO:0021535	cell migration in hindbrain	TRUE	TRUE
Neural	GO:0021547	midbrain-hindbrain boundary initiation	FALSE	TRUE
Neural	GO:0021552	midbrain-hindbrain boundary structural organization	FALSE	FALSE
Neural	GO:0021555	midbrain-hindbrain boundary morphogenesis	TRUE	TRUE
Neural	GO:0021575	hindbrain morphogenesis	FALSE	TRUE
Neural	GO:0021576	hindbrain formation	FALSE	FALSE
Neural	GO:0021577	hindbrain structural organization	FALSE	FALSE
Neural	GO:0021578	hindbrain maturation	FALSE	FALSE
Neural	GO:0021732	midbrain-hindbrain boundary maturation	FALSE	FALSE
Neural	GO:0021797	forebrain anterior/posterior pattern specification	TRUE	TRUE
Neural	GO:0021798	forebrain dorsal/ventral pattern formation	FALSE	TRUE
Neural	GO:0021846	cell proliferation in forebrain	TRUE	TRUE
Neural	GO:0021861	forebrain radial glial cell differentiation	TRUE	TRUE
Neural	GO:0021862	early neuron differentiation in forebrain	FALSE	FALSE
Neural	GO:0021863	forebrain neuroblast differentiation	FALSE	FALSE
Neural	GO:0021864	radial glial cell division in forebrain	FALSE	FALSE
Neural	GO:0021865	symmetric radial glial cell division in forebrain	FALSE	FALSE
Neural	GO:0021866	asymmetric radial glial cell division in forebrain	FALSE	FALSE
Neural	GO:0021867	neuron-producing asymmetric radial glial cell division in forebrain	FALSE	FALSE
Neural	GO:0021868	ventricular zone cell-producing asymmetric radial glial cell division in forebrain	FALSE	FALSE
Neural	GO:0021869	forebrain ventricular zone progenitor cell division	FALSE	TRUE
Neural	GO:0021871	forebrain regionalization	FALSE	TRUE
Neural	GO:0021872	forebrain generation of neurons	FALSE	TRUE
Neural	GO:0021873	forebrain neuroblast division	TRUE	TRUE
Neural	GO:0021874	Wnt receptor signaling pathway involved in forebrain neuroblast division	FALSE	TRUE
Neural	GO:0021875	fibroblast growth factor receptor signaling pathway involved in forebrain neuroblast division	FALSE	FALSE
Neural	GO:0021876	Notch signaling pathway involved in forebrain neuroblast division	FALSE	FALSE
Neural	GO:0021877	forebrain neuron fate commitment	FALSE	TRUE
Neural	GO:0021878	forebrain astrocyte fate commitment	FALSE	FALSE
Neural	GO:0021879	forebrain neuron differentiation	TRUE	TRUE
Neural	GO:0021880	Notch signaling pathway involved in forebrain neuron fate commitment	FALSE	FALSE
Neural	GO:0021881	Wnt receptor signaling pathway involved in forebrain neuron fate commitment	FALSE	FALSE
Neural	GO:0021882	regulation of transcription from RNA polymerase II promoter involved in forebrain neuron fate commitment	FALSE	TRUE
Neural	GO:0021883	cell cycle arrest of committed forebrain neuronal progenitor cell	FALSE	FALSE
Neural	GO:0021884	forebrain neuron development	TRUE	TRUE
Neural	GO:0021885	forebrain cell migration	FALSE	TRUE
Neural	GO:0021896	forebrain astrocyte differentiation	FALSE	FALSE
Neural	GO:0021897	forebrain astrocyte development	FALSE	TRUE
Neural	GO:0021898	commitment of multipotent stem cells to neuronal lineage in forebrain	FALSE	FALSE
Neural	GO:0021899	fibroblast growth factor receptor signaling pathway involved in forebrain neuron fate commitment	FALSE	FALSE
Neural	GO:0021901	early neuron fate commitment in forebrain	FALSE	FALSE
Neural	GO:0021902	commitment of neuronal cell to specific neuron type in forebrain	FALSE	TRUE
Neural	GO:0021905	forebrain-midbrain boundary formation	FALSE	TRUE
Neural	GO:0021906	hindbrain-spinal cord boundary formation	FALSE	FALSE
Neural	GO:0021923	cell proliferation in hindbrain ventricular zone	FALSE	FALSE
Neural	GO:0021931	rostral hindbrain neuronal precursor cell proliferation	FALSE	FALSE
Neural	GO:0021932	hindbrain radial glia guided cell migration	FALSE	FALSE
Neural	GO:0021934	hindbrain tangential cell migration	TRUE	TRUE
Neural	GO:0021944	neuronal-glial interaction involved in hindbrain glial-mediated radial cell migration	FALSE	FALSE
Neural	GO:0021949	brainstem precerebellar neuron precursor migration	FALSE	FALSE
Neural	GO:0022000	forebrain induction by the anterior neural ridge	FALSE	FALSE
Neural	GO:0022004	midbrain-hindbrain boundary maturation during brain development	TRUE	TRUE
Neural	GO:0022005	midbrain-hindbrain boundary maturation during neural plate development	FALSE	FALSE
Neural	GO:0022012	subpallium cell proliferation in forebrain	FALSE	FALSE
Neural	GO:0022013	pallium cell proliferation in forebrain	FALSE	FALSE
Neural	GO:0022023	radial glial cell fate commitment in forebrain	FALSE	FALSE
Neural	GO:0022024	BMP signaling pathway involved in forebrain neuron fate commitment	FALSE	FALSE
Neural	GO:0022025	leukemia inhibitory factor signaling pathway involved in forebrain neuron fate commitment	FALSE	FALSE
Neural	GO:0022026	epidermal growth factor signaling pathway involved in forebrain neuron fate commitment	FALSE	FALSE
Neural	GO:0030900	forebrain development	TRUE	TRUE
Neural	GO:0030901	midbrain development	TRUE	TRUE
Neural	GO:0030902	hindbrain development	TRUE	TRUE
Neural	GO:0030917	midbrain-hindbrain boundary development	TRUE	TRUE
Neural	GO:0031290	retinal ganglion cell axon guidance	TRUE	TRUE
Neural	GO:0031546	brain-derived neurotrophic factor receptor binding	FALSE	FALSE
Neural	GO:0031547	brain-derived neurotrophic factor receptor signaling pathway	FALSE	TRUE
Neural	GO:0031548	regulation of brain-derived neurotrophic factor receptor signaling pathway	FALSE	FALSE
Neural	GO:0031549	negative regulation of brain-derived neurotrophic factor receptor signaling pathway	FALSE	FALSE
Neural	GO:0031550	positive regulation of brain-derived neurotrophic factor receptor signaling pathway	FALSE	FALSE
Neural	GO:0031551	regulation of brain-derived neurotrophic factor-activated receptor activity	FALSE	FALSE
Neural	GO:0031552	negative regulation of brain-derived neurotrophic factor-activated receptor activity	FALSE	FALSE
Neural	GO:0031553	positive regulation of brain-derived neurotrophic factor-activated receptor activity	FALSE	FALSE
Neural	GO:0032279	asymmetric synapse	TRUE	TRUE
Neural	GO:0032280	symmetric synapse	FALSE	FALSE
Neural	GO:0033278	cell proliferation in midbrain	FALSE	TRUE
Neural	GO:0035284	brain segmentation	TRUE	TRUE
Neural	GO:0035418	protein localization to synapse	TRUE	TRUE
Neural	GO:0035633	maintenance of blood-brain barrier	FALSE	TRUE
Neural	GO:0042574	retinal metabolic process	TRUE	TRUE
Neural	GO:0042670	retinal cone cell differentiation	FALSE	FALSE
Neural	GO:0042671	retinal cone cell fate determination	FALSE	FALSE
Neural	GO:0042672	retinal cone cell fate specification	FALSE	FALSE
Neural	GO:0042673	regulation of retinal cone cell fate specification	FALSE	FALSE
Neural	GO:0044221	host cell synapse	FALSE	FALSE
Neural	GO:0044456	synapse part	FALSE	TRUE
Neural	GO:0045202	synapse	TRUE	TRUE
Neural	GO:0046548	retinal rod cell development	TRUE	TRUE
Neural	GO:0046549	retinal cone cell development	TRUE	TRUE
Neural	GO:0046551	retinal cone cell fate commitment	FALSE	FALSE
Neural	GO:0046666	retinal cell programmed cell death	TRUE	TRUE
Neural	GO:0046667	compound eye retinal cell programmed cell death	FALSE	FALSE
Neural	GO:0046668	regulation of retinal cell programmed cell death	FALSE	TRUE
Neural	GO:0046669	regulation of compound eye retinal cell programmed cell death	FALSE	FALSE
Neural	GO:0046670	positive regulation of retinal cell programmed cell death	FALSE	TRUE
Neural	GO:0046671	negative regulation of retinal cell programmed cell death	TRUE	TRUE
Neural	GO:0046672	positive regulation of compound eye retinal cell programmed cell death	FALSE	FALSE
Neural	GO:0046673	negative regulation of compound eye retinal cell programmed cell death	FALSE	FALSE
Neural	GO:0046876	3,4-didehydroretinal binding	FALSE	FALSE
Neural	GO:0048403	brain-derived neurotrophic factor binding	FALSE	TRUE
Neural	GO:0048853	forebrain morphogenesis	TRUE	TRUE
Neural	GO:0048854	brain morphogenesis	TRUE	TRUE
Neural	GO:0048876	chemical homeostasis within retina	FALSE	FALSE
Neural	GO:0048877	homeostasis of number of retina cells	FALSE	FALSE
Neural	GO:0050250	retinal oxidase activity	FALSE	FALSE
Neural	GO:0050803	regulation of synapse structure and activity	TRUE	TRUE
Neural	GO:0050807	regulation of synapse organization	FALSE	TRUE
Neural	GO:0050808	synapse organization	TRUE	TRUE
Neural	GO:0051823	regulation of synapse structural plasticity	TRUE	TRUE
Neural	GO:0051826	negative regulation of synapse structural plasticity	FALSE	FALSE
Neural	GO:0051835	positive regulation of synapse structural plasticity	TRUE	TRUE
Neural	GO:0051963	regulation of synapse assembly	TRUE	TRUE
Neural	GO:0051964	negative regulation of synapse assembly	TRUE	TRUE
Neural	GO:0051965	positive regulation of synapse assembly	TRUE	TRUE
Neural	GO:0060040	retinal bipolar neuron differentiation	TRUE	TRUE
Neural	GO:0060041	retina development in camera-type eye	TRUE	TRUE
Neural	GO:0060042	retina morphogenesis in camera-type eye	FALSE	TRUE
Neural	GO:0060059	embryonic retina morphogenesis in camera-type eye	FALSE	TRUE
Neural	GO:0060060	post-embryonic retina morphogenesis in camera-type eye	FALSE	TRUE
Neural	GO:0060074	synapse maturation	TRUE	TRUE
Neural	GO:0060076	excitatory synapse	TRUE	TRUE
Neural	GO:0060077	inhibitory synapse	TRUE	TRUE
Neural	GO:0060175	brain-derived neurotrophic factor-activated receptor activity	FALSE	TRUE
Neural	GO:0060221	retinal rod cell differentiation	TRUE	TRUE
Neural	GO:0060222	regulation of retinal cone cell fate commitment	FALSE	FALSE
Neural	GO:0060223	retinal rod cell fate commitment	FALSE	FALSE
Neural	GO:0060224	regulation of retinal rod cell fate commitment	FALSE	FALSE
Neural	GO:0060225	positive regulation of retinal rod cell fate commitment	FALSE	FALSE
Neural	GO:0060226	negative regulation of retinal cone cell fate commitment	FALSE	FALSE
Neural	GO:0060386	synapse assembly involved in innervation	FALSE	FALSE
Neural	GO:0060856	establishment of blood-brain barrier	FALSE	FALSE
Neural	GO:0060857	establishment of glial blood-brain barrier	FALSE	FALSE
Neural	GO:0061074	regulation of neural retina development	FALSE	FALSE
Neural	GO:0061075	positive regulation of neural retina development	FALSE	FALSE
Neural	GO:0061076	negative regulation of neural retina development	FALSE	FALSE
Neural	GO:0061298	retina vasculature development in camera-type eye	TRUE	TRUE
Neural	GO:0061299	retina vasculature morphogenesis in camera-type eye	TRUE	TRUE
Neural	GO:0061304	retinal blood vessel morphogenesis	FALSE	TRUE
Neural	GO:0090125	cell-cell adhesion involved in synapse maturation	FALSE	FALSE
Neural	GO:0090126	protein complex assembly involved in synapse maturation	FALSE	FALSE
Neural	GO:0090127	positive regulation of synapse maturation by synaptic transmission	FALSE	FALSE
Neural	GO:0090128	regulation of synapse maturation	FALSE	TRUE
Neural	GO:0090129	positive regulation of synapse maturation	TRUE	TRUE
Neural	GO:0090210	regulation of establishment of blood-brain barrier	FALSE	FALSE
Neural	GO:0090211	positive regulation of establishment of blood-brain barrier	FALSE	FALSE
Neural	GO:0090212	negative regulation of establishment of blood-brain barrier	FALSE	TRUE
Neural	GO:0090259	regulation of retinal ganglion cell axon guidance	FALSE	FALSE
Neural	GO:0090260	negative regulation of retinal ganglion cell axon guidance	FALSE	TRUE
Neural	GO:0097120	receptor localization to synapse	TRUE	TRUE
Neural	GO:0097470	ribbon synapse	FALSE	FALSE
Neural	GO:0097473	retinal rod cell apoptotic process	FALSE	FALSE
Neural	GO:0097474	retinal cone cell apoptotic process	FALSE	FALSE
Neural	GO:1900383	regulation of synaptic plasticity by receptor localization to synapse	FALSE	FALSE
Neural	GO:1901692	regulation of compound eye retinal cell apoptotic process	FALSE	FALSE
Neural	GO:1901693	negative regulation of compound eye retinal cell apoptotic process	FALSE	FALSE
Neural	GO:1901694	positive regulation of compound eye retinal cell apoptotic process	FALSE	FALSE
Neural	GO:1902336	positive regulation of retinal ganglion cell axon guidance	FALSE	FALSE
Neural	GO:1902473	regulation of protein localization to synapse	FALSE	FALSE
Neural	GO:1902474	positive regulation of protein localization to synapse	FALSE	FALSE
Neural	GO:1990009	retinal cell apoptotic process	FALSE	FALSE
Neural	GO:1990010	compound eye retinal cell apoptotic process	FALSE	FALSE
Neural	GO:2000297	negative regulation of synapse maturation	FALSE	TRUE
Neural	GO:2000977	regulation of forebrain neuron differentiation	FALSE	FALSE
Neural	GO:2000978	negative regulation of forebrain neuron differentiation	TRUE	TRUE
Neural	GO:2000979	positive regulation of forebrain neuron differentiation	FALSE	TRUE
Muscle	GO:0000142	cellular bud neck contractile ring	FALSE	FALSE
Muscle	GO:0000331	contractile vacuole	FALSE	FALSE
Muscle	GO:0000912	assembly of actomyosin apparatus involved in cytokinesis	FALSE	FALSE
Muscle	GO:0000915	cytokinesis, actomyosin contractile ring assembly	FALSE	TRUE
Muscle	GO:0000916	actomyosin contractile ring contraction	FALSE	FALSE
Muscle	GO:0002074	extraocular skeletal muscle development	TRUE	TRUE
Muscle	GO:0002075	somitomeric trunk muscle development	FALSE	FALSE
Muscle	GO:0003009	skeletal muscle contraction	TRUE	TRUE
Muscle	GO:0003010	voluntary skeletal muscle contraction	FALSE	FALSE
Muscle	GO:0003011	involuntary skeletal muscle contraction	FALSE	FALSE
Muscle	GO:0003012	muscle system process	FALSE	TRUE
Muscle	GO:0003056	regulation of vascular smooth muscle contraction	FALSE	TRUE
Muscle	GO:0003165	Purkinje myocyte development	FALSE	FALSE
Muscle	GO:0003168	Purkinje myocyte differentiation	FALSE	TRUE
Muscle	GO:0003220	left ventricular cardiac muscle tissue morphogenesis	FALSE	FALSE
Muscle	GO:0003221	right ventricular cardiac muscle tissue morphogenesis	FALSE	TRUE
Muscle	GO:0003222	ventricular trabecula myocardium morphogenesis	FALSE	TRUE
Muscle	GO:0003223	ventricular compact myocardium morphogenesis	TRUE	TRUE
Muscle	GO:0003224	left ventricular compact myocardium morphogenesis	FALSE	FALSE
Muscle	GO:0003225	left ventricular trabecular myocardium morphogenesis	FALSE	FALSE
Muscle	GO:0003226	right ventricular compact myocardium morphogenesis	FALSE	FALSE
Muscle	GO:0003227	right ventricular trabecular myocardium morphogenesis	FALSE	FALSE
Muscle	GO:0003228	atrial cardiac muscle tissue development	FALSE	FALSE
Muscle	GO:0003229	ventricular cardiac muscle tissue development	FALSE	TRUE
Muscle	GO:0003245	cardiac muscle tissue growth involved in heart morphogenesis	FALSE	FALSE
Muscle	GO:0003246	embryonic cardiac muscle cell growth involved in heart morphogenesis	FALSE	FALSE
Muscle	GO:0003247	post-embryonic cardiac muscle cell growth involved in heart morphogenesis	FALSE	FALSE
Muscle	GO:0003256	regulation of transcription from RNA polymerase II promoter involved in myocardial precursor cell differentiation	FALSE	FALSE
Muscle	GO:0003257	positive regulation of transcription from RNA polymerase II promoter involved in myocardial precursor cell differentiation	TRUE	TRUE
Muscle	GO:0003261	cardiac muscle progenitor cell migration to the midline involved in heart field formation	FALSE	FALSE
Muscle	GO:0003298	physiological muscle hypertrophy	FALSE	FALSE
Muscle	GO:0003299	muscle hypertrophy in response to stress	FALSE	FALSE
Muscle	GO:0003300	cardiac muscle hypertrophy	FALSE	TRUE
Muscle	GO:0003301	physiological cardiac muscle hypertrophy	FALSE	FALSE
Muscle	GO:0003304	myocardial epithelial involution involved in heart jogging	FALSE	FALSE
Muscle	GO:0003316	establishment of myocardial progenitor cell apical/basal polarity	FALSE	FALSE
Muscle	GO:0003346	epicardium-derived cell migration to the myocardium	FALSE	FALSE
Muscle	GO:0003350	pulmonary myocardium development	TRUE	TRUE
Muscle	GO:0003776	muscle motor activity	FALSE	FALSE
Muscle	GO:0004687	myosin light chain kinase activity	TRUE	TRUE
Muscle	GO:0005365	myo-inositol transmembrane transporter activity	FALSE	FALSE
Muscle	GO:0005366	myo-inositol:hydrogen symporter activity	FALSE	FALSE
Muscle	GO:0005367	myo-inositol:sodium symporter activity	FALSE	FALSE
Muscle	GO:0005523	tropomyosin binding	TRUE	TRUE
Muscle	GO:0005826	actomyosin contractile ring	FALSE	TRUE
Muscle	GO:0005859	muscle myosin complex	TRUE	TRUE
Muscle	GO:0005862	muscle thin filament tropomyosin	FALSE	TRUE
Muscle	GO:0005863	striated muscle myosin thick filament	TRUE	TRUE
Muscle	GO:0005865	striated muscle thin filament	FALSE	TRUE
Muscle	GO:0005927	muscle tendon junction	FALSE	TRUE
Muscle	GO:0006936	muscle contraction	TRUE	TRUE
Muscle	GO:0006937	regulation of muscle contraction	TRUE	TRUE
Muscle	GO:0006939	smooth muscle contraction	TRUE	TRUE
Muscle	GO:0006940	regulation of smooth muscle contraction	TRUE	TRUE
Muscle	GO:0006941	striated muscle contraction	TRUE	TRUE
Muscle	GO:0006942	regulation of striated muscle contraction	TRUE	TRUE
Muscle	GO:0007517	muscle organ development	TRUE	TRUE
Muscle	GO:0007518	myoblast fate determination	TRUE	TRUE
Muscle	GO:0007519	skeletal muscle tissue development	TRUE	TRUE
Muscle	GO:0007520	myoblast fusion	TRUE	TRUE
Muscle	GO:0007521	muscle cell fate determination	TRUE	TRUE
Muscle	GO:0007522	visceral muscle development	FALSE	TRUE
Muscle	GO:0007523	larval visceral muscle development	FALSE	FALSE
Muscle	GO:0007524	adult visceral muscle development	FALSE	FALSE
Muscle	GO:0007525	somatic muscle development	FALSE	TRUE
Muscle	GO:0007526	larval somatic muscle development	FALSE	FALSE
Muscle	GO:0007527	adult somatic muscle development	TRUE	TRUE
Muscle	GO:0008115	sarcosine oxidase activity	FALSE	TRUE
Muscle	GO:0008307	structural constituent of muscle	TRUE	TRUE
Muscle	GO:0008480	sarcosine dehydrogenase activity	FALSE	TRUE
Muscle	GO:0008570	myosin ATPase activity	FALSE	FALSE
Muscle	GO:0010264	myo-inositol hexakisphosphate biosynthetic process	FALSE	FALSE
Muscle	GO:0010473	GDP-galactose:myoinositol-1-phosphate guanylyltransferase activity	FALSE	FALSE
Muscle	GO:0010611	regulation of cardiac muscle hypertrophy	FALSE	TRUE
Muscle	GO:0010612	regulation of cardiac muscle adaptation	FALSE	FALSE
Muscle	GO:0010613	positive regulation of cardiac muscle hypertrophy	TRUE	TRUE
Muscle	GO:0010614	negative regulation of cardiac muscle hypertrophy	FALSE	TRUE
Muscle	GO:0010615	positive regulation of cardiac muscle adaptation	FALSE	FALSE
Muscle	GO:0010616	negative regulation of cardiac muscle adaptation	FALSE	TRUE
Muscle	GO:0010656	negative regulation of muscle cell apoptotic process	FALSE	FALSE
Muscle	GO:0010657	muscle cell apoptotic process	FALSE	TRUE
Muscle	GO:0010658	striated muscle cell apoptotic process	FALSE	FALSE
Muscle	GO:0010659	cardiac muscle cell apoptotic process	TRUE	TRUE
Muscle	GO:0010660	regulation of muscle cell apoptotic process	FALSE	FALSE
Muscle	GO:0010661	positive regulation of muscle cell apoptotic process	FALSE	FALSE
Muscle	GO:0010662	regulation of striated muscle cell apoptotic process	FALSE	FALSE
Muscle	GO:0010663	positive regulation of striated muscle cell apoptotic process	FALSE	FALSE
Muscle	GO:0010664	negative regulation of striated muscle cell apoptotic process	FALSE	FALSE
Muscle	GO:0010665	regulation of cardiac muscle cell apoptotic process	FALSE	FALSE
Muscle	GO:0010666	positive regulation of cardiac muscle cell apoptotic process	FALSE	TRUE
Muscle	GO:0010667	negative regulation of cardiac muscle cell apoptotic process	TRUE	TRUE
Muscle	GO:0010830	regulation of myotube differentiation	TRUE	TRUE
Muscle	GO:0010831	positive regulation of myotube differentiation	TRUE	TRUE
Muscle	GO:0010832	negative regulation of myotube differentiation	TRUE	TRUE
Muscle	GO:0010880	regulation of release of sequestered calcium ion into cytosol by sarcoplasmic reticulum	TRUE	TRUE
Muscle	GO:0010881	regulation of cardiac muscle contraction by regulation of the release of sequestered calcium ion	TRUE	TRUE
Muscle	GO:0010882	regulation of cardiac muscle contraction by calcium ion signaling	FALSE	TRUE
Muscle	GO:0014701	junctional sarcoplasmic reticulum membrane	TRUE	TRUE
Muscle	GO:0014702	free sarcoplasmic reticulum membrane	FALSE	FALSE
Muscle	GO:0014703	oscillatory muscle contraction	FALSE	FALSE
Muscle	GO:0014706	striated muscle tissue development	FALSE	TRUE
Muscle	GO:0014707	branchiomeric skeletal muscle development	TRUE	TRUE
Muscle	GO:0014708	regulation of somitomeric trunk muscle development	FALSE	FALSE
Muscle	GO:0014709	positive regulation of somitomeric trunk muscle development	FALSE	FALSE
Muscle	GO:0014710	negative regulation of somitomeric trunk muscle development	FALSE	FALSE
Muscle	GO:0014711	regulation of branchiomeric skeletal muscle development	FALSE	FALSE
Muscle	GO:0014712	positive regulation of branchiomeric skeletal muscle development	FALSE	FALSE
Muscle	GO:0014713	negative regulation of branchiomeric skeletal muscle development	FALSE	FALSE
Muscle	GO:0014714	myoblast fate commitment in head	FALSE	FALSE
Muscle	GO:0014715	myoblast fate commitment in trunk	FALSE	FALSE
Muscle	GO:0014716	satellite cell asymmetric division involved in skeletal muscle regeneration	FALSE	FALSE
Muscle	GO:0014717	regulation of satellite cell activation involved in skeletal muscle regeneration	FALSE	FALSE
Muscle	GO:0014718	positive regulation of satellite cell activation involved in skeletal muscle regeneration	FALSE	TRUE
Muscle	GO:0014720	tonic skeletal muscle contraction	FALSE	FALSE
Muscle	GO:0014721	twitch skeletal muscle contraction	FALSE	FALSE
Muscle	GO:0014722	regulation of skeletal muscle contraction by calcium ion signaling	FALSE	TRUE
Muscle	GO:0014723	regulation of skeletal muscle contraction by modulation of calcium ion sensitivity of myofibril	FALSE	FALSE
Muscle	GO:0014724	regulation of twitch skeletal muscle contraction	FALSE	FALSE
Muscle	GO:0014725	regulation of extraocular skeletal muscle development	FALSE	FALSE
Muscle	GO:0014726	negative regulation of extraocular skeletal muscle development	FALSE	FALSE
Muscle	GO:0014727	positive regulation of extraocular skeletal muscle development	FALSE	FALSE
Muscle	GO:0014728	regulation of the force of skeletal muscle contraction	FALSE	FALSE
Muscle	GO:0014729	regulation of the velocity of shortening of skeletal muscle modulating contraction	FALSE	FALSE
Muscle	GO:0014730	skeletal muscle regeneration at neuromuscular junction	FALSE	FALSE
Muscle	GO:0014732	skeletal muscle atrophy	FALSE	TRUE
Muscle	GO:0014733	regulation of skeletal muscle adaptation	FALSE	FALSE
Muscle	GO:0014734	skeletal muscle hypertrophy	FALSE	FALSE
Muscle	GO:0014735	regulation of muscle atrophy	FALSE	FALSE
Muscle	GO:0014736	negative regulation of muscle atrophy	FALSE	FALSE
Muscle	GO:0014737	positive regulation of muscle atrophy	FALSE	FALSE
Muscle	GO:0014738	regulation of muscle hyperplasia	FALSE	FALSE
Muscle	GO:0014739	positive regulation of muscle hyperplasia	FALSE	TRUE
Muscle	GO:0014740	negative regulation of muscle hyperplasia	TRUE	TRUE
Muscle	GO:0014741	negative regulation of muscle hypertrophy	FALSE	TRUE
Muscle	GO:0014742	positive regulation of muscle hypertrophy	FALSE	FALSE
Muscle	GO:0014743	regulation of muscle hypertrophy	FALSE	FALSE
Muscle	GO:0014744	positive regulation of muscle adaptation	FALSE	FALSE
Muscle	GO:0014745	negative regulation of muscle adaptation	FALSE	FALSE
Muscle	GO:0014746	regulation of tonic skeletal muscle contraction	FALSE	FALSE
Muscle	GO:0014747	positive regulation of tonic skeletal muscle contraction	FALSE	FALSE
Muscle	GO:0014748	negative regulation of tonic skeletal muscle contraction	FALSE	FALSE
Muscle	GO:0014801	longitudinal sarcoplasmic reticulum	FALSE	FALSE
Muscle	GO:0014803	longitudinal sarcoplasmic reticulum lumen	FALSE	FALSE
Muscle	GO:0014805	smooth muscle adaptation	TRUE	FALSE
Muscle	GO:0014806	smooth muscle hyperplasia	TRUE	TRUE
Muscle	GO:0014808	release of sequestered calcium ion into cytosol by sarcoplasmic reticulum	TRUE	TRUE
Muscle	GO:0014809	regulation of skeletal muscle contraction by regulation of release of sequestered calcium ion	TRUE	TRUE
Muscle	GO:0014810	positive regulation of skeletal muscle contraction by regulation of release of sequestered calcium ion	FALSE	FALSE
Muscle	GO:0014811	negative regulation of skeletal muscle contraction by regulation of release of sequestered calcium ion	FALSE	FALSE
Muscle	GO:0014812	muscle cell migration	FALSE	TRUE
Muscle	GO:0014815	initiation of satellite cell activation by growth factor signalling, involved in skeletal muscle regeneration	FALSE	FALSE
Muscle	GO:0014819	regulation of skeletal muscle contraction	FALSE	TRUE
Muscle	GO:0014820	tonic smooth muscle contraction	FALSE	TRUE
Muscle	GO:0014821	phasic smooth muscle contraction	FALSE	FALSE
Muscle	GO:0014824	artery smooth muscle contraction	TRUE	TRUE
Muscle	GO:0014825	stomach fundus smooth muscle contraction	FALSE	FALSE
Muscle	GO:0014826	vein smooth muscle contraction	TRUE	TRUE
Muscle	GO:0014827	intestine smooth muscle contraction	FALSE	TRUE
Muscle	GO:0014828	distal stomach smooth muscle contraction	FALSE	FALSE
Muscle	GO:0014829	vascular smooth muscle contraction	TRUE	TRUE
Muscle	GO:0014830	arteriole smooth muscle contraction	FALSE	FALSE
Muscle	GO:0014831	gastro-intestinal system smooth muscle contraction	FALSE	FALSE
Muscle	GO:0014832	urinary bladder smooth muscle contraction	TRUE	TRUE
Muscle	GO:0014834	satellite cell maintenance involved in skeletal muscle regeneration	FALSE	TRUE
Muscle	GO:0014835	myoblast differentiation involved in skeletal muscle regeneration	TRUE	TRUE
Muscle	GO:0014836	myoblast fate commitment involved in skeletal muscle regeneration	FALSE	FALSE
Muscle	GO:0014837	myoblast fate determination involved in skeletal muscle regeneration	FALSE	FALSE
Muscle	GO:0014838	myoblast fate specification involved in skeletal muscle regeneration	FALSE	FALSE
Muscle	GO:0014839	myoblast migration involved in skeletal muscle regeneration	FALSE	FALSE
Muscle	GO:0014844	myoblast proliferation involved in skeletal muscle regeneration	FALSE	FALSE
Muscle	GO:0014845	stomach body smooth muscle contraction	FALSE	FALSE
Muscle	GO:0014846	esophagus smooth muscle contraction	FALSE	TRUE
Muscle	GO:0014847	proximal stomach smooth muscle contraction	FALSE	FALSE
Muscle	GO:0014848	urinary tract smooth muscle contraction	FALSE	FALSE
Muscle	GO:0014849	ureter smooth muscle contraction	FALSE	FALSE
Muscle	GO:0014850	response to muscle activity	TRUE	TRUE
Muscle	GO:0014852	regulation of skeletal muscle contraction by neural stimulation via neuromuscular junction	FALSE	FALSE
Muscle	GO:0014853	regulation of excitatory postsynaptic membrane potential involved in skeletal muscle contraction	FALSE	TRUE
Muscle	GO:0014855	striated muscle cell proliferation	FALSE	FALSE
Muscle	GO:0014856	skeletal muscle cell proliferation	FALSE	FALSE
Muscle	GO:0014857	regulation of skeletal muscle cell proliferation	FALSE	FALSE
Muscle	GO:0014858	positive regulation of skeletal muscle cell proliferation	FALSE	TRUE
Muscle	GO:0014859	negative regulation of skeletal muscle cell proliferation	FALSE	FALSE
Muscle	GO:0014860	neurotransmitter secretion involved in regulation of skeletal muscle contraction	FALSE	FALSE
Muscle	GO:0014861	regulation of skeletal muscle contraction via regulation of action potential	FALSE	FALSE
Muscle	GO:0014862	regulation of skeletal muscle contraction by chemo-mechanical energy conversion	FALSE	FALSE
Muscle	GO:0014864	detection of muscle activity	FALSE	FALSE
Muscle	GO:0014866	skeletal myofibril assembly	FALSE	FALSE
Muscle	GO:0014868	cross bridge cycling involved in regulation of the velocity of shortening in skeletal muscle contraction	FALSE	FALSE
Muscle	GO:0014869	detection of muscle inactivity	FALSE	FALSE
Muscle	GO:0014870	response to muscle inactivity	FALSE	FALSE
Muscle	GO:0014871	cross bridge formation involved in regulation of the velocity of shortening in skeletal muscle contraction	FALSE	FALSE
Muscle	GO:0014872	myoblast division	FALSE	FALSE
Muscle	GO:0014873	response to muscle activity involved in regulation of muscle adaptation	FALSE	TRUE
Muscle	GO:0014874	response to stimulus involved in regulation of muscle adaptation	FALSE	FALSE
Muscle	GO:0014875	detection of muscle activity involved in regulation of muscle adaptation	FALSE	FALSE
Muscle	GO:0014876	response to injury involved in regulation of muscle adaptation	FALSE	FALSE
Muscle	GO:0014877	response to muscle inactivity involved in regulation of muscle adaptation	FALSE	FALSE
Muscle	GO:0014878	response to electrical stimulus involved in regulation of muscle adaptation	FALSE	TRUE
Muscle	GO:0014879	detection of electrical stimulus involved in regulation of muscle adaptation	FALSE	FALSE
Muscle	GO:0014880	regulation of muscle filament sliding involved in regulation of the velocity of shortening in skeletal muscle contraction	FALSE	FALSE
Muscle	GO:0014881	regulation of myofibril size	FALSE	FALSE
Muscle	GO:0014882	regulation of myofibril number	FALSE	FALSE
Muscle	GO:0014884	detection of muscle inactivity involved in regulation of muscle adaptation	FALSE	FALSE
Muscle	GO:0014885	detection of injury involved in regulation of muscle adaptation	FALSE	FALSE
Muscle	GO:0014887	cardiac muscle adaptation	FALSE	FALSE
Muscle	GO:0014888	striated muscle adaptation	FALSE	FALSE
Muscle	GO:0014889	muscle atrophy	FALSE	TRUE
Muscle	GO:0014890	smooth muscle atrophy	FALSE	FALSE
Muscle	GO:0014891	striated muscle atrophy	FALSE	FALSE
Muscle	GO:0014893	response to rest involved in regulation of muscle adaptation	FALSE	FALSE
Muscle	GO:0014894	response to denervation involved in regulation of muscle adaptation	TRUE	TRUE
Muscle	GO:0014895	smooth muscle hypertrophy	FALSE	TRUE
Muscle	GO:0014896	muscle hypertrophy	FALSE	TRUE
Muscle	GO:0014897	striated muscle hypertrophy	FALSE	FALSE
Muscle	GO:0014898	cardiac muscle hypertrophy in response to stress	TRUE	TRUE
Muscle	GO:0014899	cardiac muscle atrophy	FALSE	FALSE
Muscle	GO:0014900	muscle hyperplasia	FALSE	FALSE
Muscle	GO:0014901	satellite cell activation involved in skeletal muscle regeneration	FALSE	FALSE
Muscle	GO:0014902	myotube differentiation	TRUE	TRUE
Muscle	GO:0014904	myotube cell development	FALSE	TRUE
Muscle	GO:0014905	myoblast fusion involved in skeletal muscle regeneration	FALSE	FALSE
Muscle	GO:0014906	myotube cell development involved in skeletal muscle regeneration	FALSE	FALSE
Muscle	GO:0014908	myotube differentiation involved in skeletal muscle regeneration	FALSE	TRUE
Muscle	GO:0014909	smooth muscle cell migration	TRUE	TRUE
Muscle	GO:0014910	regulation of smooth muscle cell migration	TRUE	TRUE
Muscle	GO:0014911	positive regulation of smooth muscle cell migration	TRUE	TRUE
Muscle	GO:0014912	negative regulation of smooth muscle cell migration	TRUE	TRUE
Muscle	GO:0014914	myoblast maturation involved in muscle regeneration	FALSE	FALSE
Muscle	GO:0014915	regulation of muscle filament sliding speed involved in regulation of the velocity of shortening in skeletal muscle contraction	FALSE	FALSE
Muscle	GO:0015798	myo-inositol transport	FALSE	TRUE
Muscle	GO:0016012	sarcoglycan complex	TRUE	TRUE
Muscle	GO:0016084	myostimulatory hormone activity	FALSE	FALSE
Muscle	GO:0016085	myoinhibitory hormone activity	FALSE	FALSE
Muscle	GO:0016202	regulation of striated muscle tissue development	TRUE	TRUE
Muscle	GO:0016203	muscle attachment	FALSE	FALSE
Muscle	GO:0016204	determination of muscle attachment site	FALSE	FALSE
Muscle	GO:0016459	myosin complex	TRUE	TRUE
Muscle	GO:0016460	myosin II complex	TRUE	TRUE
Muscle	GO:0016461	unconventional myosin complex	TRUE	TRUE
Muscle	GO:0016528	sarcoplasm	TRUE	TRUE
Muscle	GO:0016529	sarcoplasmic reticulum	TRUE	TRUE
Muscle	GO:0016905	myosin heavy chain kinase activity	FALSE	FALSE
Muscle	GO:0017018	myosin phosphatase activity	TRUE	TRUE
Muscle	GO:0017020	myosin phosphatase regulator activity	FALSE	TRUE
Muscle	GO:0017021	myosin phosphatase myosin binding	FALSE	FALSE
Muscle	GO:0017022	myosin binding	FALSE	TRUE
Muscle	GO:0017023	myosin phosphatase complex	FALSE	FALSE
Muscle	GO:0017024	myosin I binding	FALSE	FALSE
Muscle	GO:0019736	peptidyl-sarcosine incorporation	FALSE	FALSE
Muscle	GO:0030016	myofibril	TRUE	TRUE
Muscle	GO:0030017	sarcomere	TRUE	TRUE
Muscle	GO:0030038	contractile actin filament bundle assembly	TRUE	TRUE
Muscle	GO:0030049	muscle filament sliding	TRUE	TRUE
Muscle	GO:0030239	myofibril assembly	TRUE	TRUE
Muscle	GO:0030240	skeletal muscle thin filament assembly	FALSE	TRUE
Muscle	GO:0030241	skeletal muscle myosin thick filament assembly	FALSE	TRUE
Muscle	GO:0030484	muscle fiber	FALSE	FALSE
Muscle	GO:0030485	smooth muscle contractile fiber	TRUE	TRUE
Muscle	GO:0030486	smooth muscle dense body	FALSE	FALSE
Muscle	GO:0031032	actomyosin structure organization	TRUE	TRUE
Muscle	GO:0031033	myosin filament organization	FALSE	FALSE
Muscle	GO:0031034	myosin filament assembly	FALSE	TRUE
Muscle	GO:0031035	myosin filament disassembly	FALSE	FALSE
Muscle	GO:0031036	myosin II filament assembly	FALSE	FALSE
Muscle	GO:0031037	myosin II filament disassembly	FALSE	FALSE
Muscle	GO:0031038	myosin II filament organization	FALSE	FALSE
Muscle	GO:0031164	contractile vacuolar membrane	FALSE	FALSE
Muscle	GO:0031165	integral to contractile vacuolar membrane	FALSE	FALSE
Muscle	GO:0031311	intrinsic to contractile vacuolar membrane	FALSE	FALSE
Muscle	GO:0031443	fast-twitch skeletal muscle fiber contraction	FALSE	FALSE
Muscle	GO:0031444	slow-twitch skeletal muscle fiber contraction	TRUE	TRUE
Muscle	GO:0031446	regulation of fast-twitch skeletal muscle fiber contraction	FALSE	FALSE
Muscle	GO:0031447	negative regulation of fast-twitch skeletal muscle fiber contraction	FALSE	FALSE
Muscle	GO:0031448	positive regulation of fast-twitch skeletal muscle fiber contraction	FALSE	TRUE
Muscle	GO:0031449	regulation of slow-twitch skeletal muscle fiber contraction	FALSE	FALSE
Muscle	GO:0031450	negative regulation of slow-twitch skeletal muscle fiber contraction	FALSE	FALSE
Muscle	GO:0031451	positive regulation of slow-twitch skeletal muscle fiber contraction	FALSE	FALSE
Muscle	GO:0031473	myosin III binding	FALSE	FALSE
Muscle	GO:0031474	myosin IV complex	FALSE	FALSE
Muscle	GO:0031475	myosin V complex	FALSE	FALSE
Muscle	GO:0031476	myosin VI complex	FALSE	FALSE
Muscle	GO:0031477	myosin VII complex	FALSE	FALSE
Muscle	GO:0031478	myosin VIII complex	FALSE	FALSE
Muscle	GO:0031479	myosin IX complex	FALSE	FALSE
Muscle	GO:0031480	myosin X complex	FALSE	FALSE
Muscle	GO:0031481	myosin XI complex	FALSE	FALSE
Muscle	GO:0031482	myosin XII complex	FALSE	FALSE
Muscle	GO:0031483	myosin XIII complex	FALSE	FALSE
Muscle	GO:0031484	myosin XIV complex	FALSE	FALSE
Muscle	GO:0031485	myosin XV complex	FALSE	FALSE
Muscle	GO:0031486	myosin XVI complex	FALSE	FALSE
Muscle	GO:0031487	myosin XVII complex	FALSE	FALSE
Muscle	GO:0031488	myosin XVIII complex	FALSE	FALSE
Muscle	GO:0031489	myosin V binding	FALSE	TRUE
Muscle	GO:0031566	actomyosin contractile ring maintenance	FALSE	FALSE
Muscle	GO:0031913	contractile vacuole pore	FALSE	FALSE
Muscle	GO:0031991	regulation of actomyosin contractile ring contraction	FALSE	FALSE
Muscle	GO:0032027	myosin light chain binding	FALSE	TRUE
Muscle	GO:0032028	myosin head/neck binding	FALSE	TRUE
Muscle	GO:0032029	myosin tail binding	FALSE	FALSE
Muscle	GO:0032030	myosin I light chain binding	FALSE	FALSE
Muscle	GO:0032031	myosin I head/neck binding	FALSE	FALSE
Muscle	GO:0032032	myosin I tail binding	FALSE	FALSE
Muscle	GO:0032033	myosin II light chain binding	FALSE	FALSE
Muscle	GO:0032034	myosin II head/neck binding	FALSE	FALSE
Muscle	GO:0032035	myosin II tail binding	FALSE	FALSE
Muscle	GO:0032036	myosin heavy chain binding	TRUE	TRUE
Muscle	GO:0032037	myosin I heavy chain binding	FALSE	FALSE
Muscle	GO:0032038	myosin II heavy chain binding	TRUE	FALSE
Muscle	GO:0032157	prospore contractile ring	FALSE	FALSE
Muscle	GO:0032187	actomyosin contractile ring localization	FALSE	FALSE
Muscle	GO:0032188	establishment of actomyosin contractile ring localization	FALSE	FALSE
Muscle	GO:0032189	maintenance of actomyosin contractile ring localization	FALSE	FALSE
Muscle	GO:0032921	sarcosine oxidase complex	FALSE	FALSE
Muscle	GO:0032971	regulation of muscle filament sliding	TRUE	TRUE
Muscle	GO:0032972	regulation of muscle filament sliding speed	FALSE	FALSE
Muscle	GO:0032982	myosin filament	TRUE	TRUE
Muscle	GO:0033002	muscle cell proliferation	FALSE	FALSE
Muscle	GO:0033017	sarcoplasmic reticulum membrane	TRUE	TRUE
Muscle	GO:0033018	sarcoplasmic reticulum lumen	TRUE	TRUE
Muscle	GO:0033271	myo-inositol phosphate transport	FALSE	FALSE
Muscle	GO:0033272	myo-inositol hexakisphosphate transport	FALSE	FALSE
Muscle	GO:0033275	actin-myosin filament sliding	FALSE	TRUE
Muscle	GO:0033298	contractile vacuole organization	FALSE	FALSE
Muscle	GO:0033517	myo-inositol hexakisphosphate metabolic process	FALSE	FALSE
Muscle	GO:0033518	myo-inositol hexakisphosphate dephosphorylation	FALSE	FALSE
Muscle	GO:0033545	myo-inositol hexakisphosphate biosynthetic process, lipid-dependent	FALSE	FALSE
Muscle	GO:0033546	myo-inositol hexakisphosphate biosynthetic process, via inositol 1,3,4-trisphosphate	FALSE	FALSE
Muscle	GO:0033547	myo-inositol hexakisphosphate biosynthetic process, via direct phosphorylation of inositol 1,4,5-trisphosphate	FALSE	FALSE
Muscle	GO:0033548	myo-inositol hexakisphosphate biosynthetic process, lipid-independent	FALSE	FALSE
Muscle	GO:0033794	sarcosine reductase activity	FALSE	FALSE
Muscle	GO:0033804	glycine/sarcosine N-methyltransferase activity	FALSE	FALSE
Muscle	GO:0033805	sarcosine/dimethylglycine N-methyltransferase activity	FALSE	FALSE
Muscle	GO:0034390	smooth muscle cell apoptotic process	FALSE	FALSE
Muscle	GO:0034391	regulation of smooth muscle cell apoptotic process	TRUE	TRUE
Muscle	GO:0034392	negative regulation of smooth muscle cell apoptotic process	TRUE	TRUE
Muscle	GO:0034393	positive regulation of smooth muscle cell apoptotic process	TRUE	TRUE
Muscle	GO:0035013	myosuppressin receptor activity	FALSE	FALSE
Muscle	GO:0035504	regulation of myosin light chain kinase activity	FALSE	FALSE
Muscle	GO:0035505	positive regulation of myosin light chain kinase activity	TRUE	TRUE
Muscle	GO:0035506	negative regulation of myosin light chain kinase activity	FALSE	FALSE
Muscle	GO:0035507	regulation of myosin-light-chain-phosphatase activity	FALSE	TRUE
Muscle	GO:0035508	positive regulation of myosin-light-chain-phosphatase activity	FALSE	FALSE
Muscle	GO:0035509	negative regulation of myosin-light-chain-phosphatase activity	FALSE	TRUE
Muscle	GO:0035645	enteric smooth muscle cell differentiation	FALSE	TRUE
Muscle	GO:0035886	vascular smooth muscle cell differentiation	TRUE	TRUE
Muscle	GO:0035887	aortic smooth muscle cell differentiation	FALSE	TRUE
Muscle	GO:0035914	skeletal muscle cell differentiation	TRUE	TRUE
Muscle	GO:0035981	tongue muscle cell differentiation	FALSE	FALSE
Muscle	GO:0035994	response to muscle stretch	TRUE	TRUE
Muscle	GO:0035995	detection of muscle stretch	FALSE	FALSE
Muscle	GO:0036061	muscle cell chemotaxis toward tendon cell	FALSE	FALSE
Muscle	GO:0036194	muscle cell projection	FALSE	FALSE
Muscle	GO:0036195	muscle cell projection membrane	FALSE	FALSE
Muscle	GO:0036212	contractile ring maintenance	FALSE	FALSE
Muscle	GO:0036213	contractile ring contraction	FALSE	FALSE
Muscle	GO:0036214	contractile ring localization	FALSE	FALSE
Muscle	GO:0036379	myofilament	FALSE	FALSE
Muscle	GO:0036446	myofibroblast differentiation	FALSE	FALSE
Muscle	GO:0042383	sarcolemma	TRUE	TRUE
Muscle	GO:0042385	myosin III complex	FALSE	FALSE
Muscle	GO:0042641	actomyosin	FALSE	TRUE
Muscle	GO:0042642	actomyosin, myosin complex part	FALSE	FALSE
Muscle	GO:0042643	actomyosin, actin portion	FALSE	TRUE
Muscle	GO:0042692	muscle cell differentiation	TRUE	TRUE
Muscle	GO:0042693	muscle cell fate commitment	TRUE	TRUE
Muscle	GO:0042694	muscle cell fate specification	TRUE	TRUE
Muscle	GO:0043282	pharyngeal muscle development	FALSE	FALSE
Muscle	GO:0043292	contractile fiber	TRUE	TRUE
Muscle	GO:0043403	skeletal muscle tissue regeneration	TRUE	TRUE
Muscle	GO:0043411	myopalladin binding	FALSE	FALSE
Muscle	GO:0043415	positive regulation of skeletal muscle tissue regeneration	FALSE	TRUE
Muscle	GO:0043416	regulation of skeletal muscle tissue regeneration	FALSE	FALSE
Muscle	GO:0043417	negative regulation of skeletal muscle tissue regeneration	FALSE	FALSE
Muscle	GO:0043500	muscle adaptation	FALSE	FALSE
Muscle	GO:0043501	skeletal muscle adaptation	FALSE	TRUE
Muscle	GO:0043502	regulation of muscle adaptation	FALSE	FALSE
Muscle	GO:0043503	skeletal muscle fiber adaptation	FALSE	TRUE
Muscle	GO:0043519	regulation of myosin II filament organization	FALSE	TRUE
Muscle	GO:0043520	regulation of myosin II filament assembly	FALSE	FALSE
Muscle	GO:0043521	regulation of myosin II filament disassembly	FALSE	FALSE
Muscle	GO:0044449	contractile fiber part	FALSE	FALSE
Muscle	GO:0044521	envenomation resulting in muscle damage in other organism	FALSE	FALSE
Muscle	GO:0044522	envenomation resulting in myocyte killing in other organism	FALSE	FALSE
Muscle	GO:0044523	envenomation resulting in damage of muscle extracellular matrix in other organism	FALSE	FALSE
Muscle	GO:0044557	relaxation of smooth muscle	FALSE	FALSE
Muscle	GO:0044558	uterine smooth muscle relaxation	FALSE	FALSE
Muscle	GO:0044616	modulation of relaxation of muscle in other organism	FALSE	FALSE
Muscle	GO:0044617	modulation of relaxation of smooth muscle in other organism	FALSE	FALSE
Muscle	GO:0044618	modulation of relaxation of uterine smooth muscle in other organism	FALSE	FALSE
Muscle	GO:0044619	positive regulation of relaxation of uterine smooth muscle in other organism	FALSE	FALSE
Muscle	GO:0045159	myosin II binding	TRUE	FALSE
Muscle	GO:0045160	myosin I complex	FALSE	TRUE
Muscle	GO:0045214	sarcomere organization	TRUE	TRUE
Muscle	GO:0045445	myoblast differentiation	TRUE	TRUE
Muscle	GO:0045661	regulation of myoblast differentiation	FALSE	TRUE
Muscle	GO:0045662	negative regulation of myoblast differentiation	TRUE	TRUE
Muscle	GO:0045663	positive regulation of myoblast differentiation	TRUE	TRUE
Muscle	GO:0045843	negative regulation of striated muscle tissue development	TRUE	TRUE
Muscle	GO:0045844	positive regulation of striated muscle tissue development	FALSE	TRUE
Muscle	GO:0045932	negative regulation of muscle contraction	FALSE	TRUE
Muscle	GO:0045933	positive regulation of muscle contraction	FALSE	FALSE
Muscle	GO:0045986	negative regulation of smooth muscle contraction	FALSE	TRUE
Muscle	GO:0045987	positive regulation of smooth muscle contraction	TRUE	TRUE
Muscle	GO:0045988	negative regulation of striated muscle contraction	TRUE	TRUE
Muscle	GO:0045989	positive regulation of striated muscle contraction	FALSE	TRUE
Muscle	GO:0046716	muscle cell cellular homeostasis	TRUE	TRUE
Muscle	GO:0047227	indolylacetyl-myo-inositol galactosyltransferase activity	FALSE	FALSE
Muscle	GO:0048625	myoblast fate commitment	FALSE	TRUE
Muscle	GO:0048626	myoblast fate specification	FALSE	FALSE
Muscle	GO:0048627	myoblast development	FALSE	TRUE
Muscle	GO:0048628	myoblast maturation	FALSE	FALSE
Muscle	GO:0048630	skeletal muscle tissue growth	TRUE	TRUE
Muscle	GO:0048631	regulation of skeletal muscle tissue growth	FALSE	FALSE
Muscle	GO:0048632	negative regulation of skeletal muscle tissue growth	FALSE	TRUE
Muscle	GO:0048633	positive regulation of skeletal muscle tissue growth	FALSE	TRUE
Muscle	GO:0048634	regulation of muscle organ development	FALSE	FALSE
Muscle	GO:0048635	negative regulation of muscle organ development	FALSE	TRUE
Muscle	GO:0048636	positive regulation of muscle organ development	FALSE	FALSE
Muscle	GO:0048641	regulation of skeletal muscle tissue development	TRUE	TRUE
Muscle	GO:0048642	negative regulation of skeletal muscle tissue development	TRUE	TRUE
Muscle	GO:0048643	positive regulation of skeletal muscle tissue development	FALSE	TRUE
Muscle	GO:0048644	muscle organ morphogenesis	TRUE	TRUE
Muscle	GO:0048659	smooth muscle cell proliferation	FALSE	TRUE
Muscle	GO:0048660	regulation of smooth muscle cell proliferation	TRUE	TRUE
Muscle	GO:0048661	positive regulation of smooth muscle cell proliferation	TRUE	TRUE
Muscle	GO:0048662	negative regulation of smooth muscle cell proliferation	TRUE	TRUE
Muscle	GO:0048738	cardiac muscle tissue development	TRUE	TRUE
Muscle	GO:0048739	cardiac muscle fiber development	TRUE	TRUE
Muscle	GO:0048740	striated muscle fiber development	FALSE	FALSE
Muscle	GO:0048741	skeletal muscle fiber development	TRUE	TRUE
Muscle	GO:0048742	regulation of skeletal muscle fiber development	TRUE	TRUE
Muscle	GO:0048743	positive regulation of skeletal muscle fiber development	TRUE	TRUE
Muscle	GO:0048744	negative regulation of skeletal muscle fiber development	FALSE	FALSE
Muscle	GO:0048745	smooth muscle tissue development	TRUE	TRUE
Muscle	GO:0048746	smooth muscle fiber development	FALSE	FALSE
Muscle	GO:0048747	muscle fiber development	TRUE	TRUE
Muscle	GO:0048769	sarcomerogenesis	FALSE	TRUE
Muscle	GO:0050114	myo-inosose-2 dehydratase activity	FALSE	FALSE
Muscle	GO:0050115	myosin-light-chain-phosphatase activity	TRUE	TRUE
Muscle	GO:0050127	N-carbamoylsarcosine amidase activity	FALSE	FALSE
Muscle	GO:0050359	tropomyosin kinase activity	FALSE	FALSE
Muscle	GO:0051145	smooth muscle cell differentiation	TRUE	TRUE
Muscle	GO:0051146	striated muscle cell differentiation	TRUE	TRUE
Muscle	GO:0051147	regulation of muscle cell differentiation	FALSE	TRUE
Muscle	GO:0051148	negative regulation of muscle cell differentiation	TRUE	FALSE
Muscle	GO:0051149	positive regulation of muscle cell differentiation	TRUE	TRUE
Muscle	GO:0051150	regulation of smooth muscle cell differentiation	TRUE	TRUE
Muscle	GO:0051151	negative regulation of smooth muscle cell differentiation	FALSE	TRUE
Muscle	GO:0051152	positive regulation of smooth muscle cell differentiation	TRUE	TRUE
Muscle	GO:0051153	regulation of striated muscle cell differentiation	TRUE	FALSE
Muscle	GO:0051154	negative regulation of striated muscle cell differentiation	FALSE	TRUE
Muscle	GO:0051155	positive regulation of striated muscle cell differentiation	FALSE	TRUE
Muscle	GO:0051371	muscle alpha-actinin binding	TRUE	TRUE
Muscle	GO:0051416	myotilin binding	FALSE	FALSE
Muscle	GO:0051450	myoblast proliferation	FALSE	TRUE
Muscle	GO:0051451	myoblast migration	TRUE	TRUE
Muscle	GO:0052730	sarcosine N-methyltransferase activity	FALSE	FALSE
Muscle	GO:0055001	muscle cell development	FALSE	TRUE
Muscle	GO:0055002	striated muscle cell development	FALSE	TRUE
Muscle	GO:0055003	cardiac myofibril assembly	TRUE	TRUE
Muscle	GO:0055004	atrial cardiac myofibril assembly	FALSE	FALSE
Muscle	GO:0055005	ventricular cardiac myofibril assembly	TRUE	TRUE
Muscle	GO:0055007	cardiac muscle cell differentiation	TRUE	TRUE
Muscle	GO:0055008	cardiac muscle tissue morphogenesis	TRUE	TRUE
Muscle	GO:0055009	atrial cardiac muscle tissue morphogenesis	TRUE	TRUE
Muscle	GO:0055010	ventricular cardiac muscle tissue morphogenesis	TRUE	TRUE
Muscle	GO:0055011	atrial cardiac muscle cell differentiation	FALSE	FALSE
Muscle	GO:0055012	ventricular cardiac muscle cell differentiation	FALSE	TRUE
Muscle	GO:0055013	cardiac muscle cell development	FALSE	TRUE
Muscle	GO:0055014	atrial cardiac muscle cell development	TRUE	TRUE
Muscle	GO:0055015	ventricular cardiac muscle cell development	TRUE	TRUE
Muscle	GO:0055017	cardiac muscle tissue growth	FALSE	FALSE
Muscle	GO:0055018	regulation of cardiac muscle fiber development	FALSE	FALSE
Muscle	GO:0055019	negative regulation of cardiac muscle fiber development	FALSE	FALSE
Muscle	GO:0055020	positive regulation of cardiac muscle fiber development	TRUE	TRUE
Muscle	GO:0055021	regulation of cardiac muscle tissue growth	FALSE	FALSE
Muscle	GO:0055022	negative regulation of cardiac muscle tissue growth	FALSE	FALSE
Muscle	GO:0055023	positive regulation of cardiac muscle tissue growth	FALSE	FALSE
Muscle	GO:0055024	regulation of cardiac muscle tissue development	FALSE	TRUE
Muscle	GO:0055025	positive regulation of cardiac muscle tissue development	FALSE	FALSE
Muscle	GO:0055026	negative regulation of cardiac muscle tissue development	FALSE	TRUE
Muscle	GO:0055117	regulation of cardiac muscle contraction	TRUE	TRUE
Muscle	GO:0055118	negative regulation of cardiac muscle contraction	TRUE	TRUE
Muscle	GO:0055119	relaxation of cardiac muscle	TRUE	TRUE
Muscle	GO:0055120	striated muscle dense body	FALSE	FALSE
Muscle	GO:0060038	cardiac muscle cell proliferation	TRUE	TRUE
Muscle	GO:0060043	regulation of cardiac muscle cell proliferation	TRUE	TRUE
Muscle	GO:0060044	negative regulation of cardiac muscle cell proliferation	FALSE	TRUE
Muscle	GO:0060045	positive regulation of cardiac muscle cell proliferation	TRUE	TRUE
Muscle	GO:0060048	cardiac muscle contraction	TRUE	TRUE
Muscle	GO:0060083	smooth muscle contraction involved in micturition	FALSE	TRUE
Muscle	GO:0060085	smooth muscle relaxation of the bladder outlet	FALSE	FALSE
Muscle	GO:0060087	relaxation of vascular smooth muscle	TRUE	TRUE
Muscle	GO:0060297	regulation of sarcomere organization	TRUE	TRUE
Muscle	GO:0060298	positive regulation of sarcomere organization	TRUE	TRUE
Muscle	GO:0060299	negative regulation of sarcomere organization	FALSE	TRUE
Muscle	GO:0060307	regulation of ventricular cardiac muscle cell membrane repolarization	TRUE	TRUE
Muscle	GO:0060371	regulation of atrial cardiac muscle cell membrane depolarization	TRUE	TRUE
Muscle	GO:0060372	regulation of atrial cardiac muscle cell membrane repolarization	FALSE	FALSE
Muscle	GO:0060373	regulation of ventricular cardiac muscle cell membrane depolarization	FALSE	TRUE
Muscle	GO:0060379	cardiac muscle cell myoblast differentiation	FALSE	TRUE
Muscle	GO:0060414	aorta smooth muscle tissue morphogenesis	FALSE	TRUE
Muscle	GO:0060415	muscle tissue morphogenesis	TRUE	TRUE
Muscle	GO:0060452	positive regulation of cardiac muscle contraction	TRUE	TRUE
Muscle	GO:0060530	smooth muscle cell differentiation involved in prostate glandular acinus development	FALSE	FALSE
Muscle	GO:0060537	muscle tissue development	TRUE	TRUE
Muscle	GO:0060538	skeletal muscle organ development	FALSE	TRUE
Muscle	GO:0060923	cardiac muscle cell fate commitment	FALSE	TRUE
Muscle	GO:0060924	atrial cardiac muscle cell fate commitment	FALSE	FALSE
Muscle	GO:0060925	ventricular cardiac muscle cell fate commitment	FALSE	FALSE
Muscle	GO:0060947	cardiac vascular smooth muscle cell differentiation	TRUE	TRUE
Muscle	GO:0060948	cardiac vascular smooth muscle cell development	TRUE	TRUE
Muscle	GO:0060949	cardiac vascular smooth muscle cell fate commitment	FALSE	FALSE
Muscle	GO:0060983	epicardium-derived cardiac vascular smooth muscle cell differentiation	FALSE	TRUE
Muscle	GO:0060984	epicardium-derived cardiac vascular smooth muscle cell development	FALSE	FALSE
Muscle	GO:0060985	epicardium-derived cardiac vascular smooth muscle cell fate commitment	FALSE	FALSE
Muscle	GO:0061026	cardiac muscle tissue regeneration	FALSE	TRUE
Muscle	GO:0061049	cell growth involved in cardiac muscle cell development	FALSE	TRUE
Muscle	GO:0061050	regulation of cell growth involved in cardiac muscle cell development	FALSE	FALSE
Muscle	GO:0061051	positive regulation of cell growth involved in cardiac muscle cell development	FALSE	FALSE
Muscle	GO:0061052	negative regulation of cell growth involved in cardiac muscle cell development	TRUE	TRUE
Muscle	GO:0061055	myotome development	FALSE	FALSE
Muscle	GO:0061061	muscle structure development	FALSE	TRUE
Muscle	GO:0061145	lung smooth muscle development	FALSE	FALSE
Muscle	GO:0061199	striated muscle contraction involved in embryonic body morphogenesis	FALSE	FALSE
Muscle	GO:0061203	striated muscle paramyosin thick filament assembly	FALSE	FALSE
Muscle	GO:0061204	paramyosin filament assembly or disassembly	FALSE	FALSE
Muscle	GO:0061214	mesonephric smooth muscle tissue development	FALSE	FALSE
Muscle	GO:0061302	smooth muscle cell-matrix adhesion	FALSE	TRUE
Muscle	GO:0061315	canonical Wnt receptor signaling pathway involved in positive regulation of cardiac muscle cell proliferation	FALSE	FALSE
Muscle	GO:0061317	canonical Wnt receptor signaling pathway involved in cardiac muscle cell fate commitment	FALSE	FALSE
Muscle	GO:0061345	planar cell polarity pathway involved in cardiac muscle cell fate commitment	FALSE	FALSE
Muscle	GO:0061350	planar cell polarity pathway involved in cardiac muscle tissue morphogenesis	TRUE	TRUE
Muscle	GO:0061442	cardiac muscle cell fate determination	FALSE	FALSE
Muscle	GO:0061455	integral to muscle cell projection membrane	FALSE	FALSE
Muscle	GO:0070177	contractile vacuole discharge	FALSE	FALSE
Muscle	GO:0070296	sarcoplasmic reticulum calcium ion transport	TRUE	FALSE
Muscle	GO:0070471	uterine smooth muscle contraction	FALSE	FALSE
Muscle	GO:0070472	regulation of uterine smooth muscle contraction	FALSE	FALSE
Muscle	GO:0070473	negative regulation of uterine smooth muscle contraction	FALSE	FALSE
Muscle	GO:0070474	positive regulation of uterine smooth muscle contraction	FALSE	TRUE
Muscle	GO:0070514	SRF-myogenin-E12 complex	FALSE	TRUE
Muscle	GO:0070853	myosin VI binding	FALSE	TRUE
Muscle	GO:0070854	myosin VI heavy chain binding	FALSE	FALSE
Muscle	GO:0070855	myosin VI head/neck binding	FALSE	FALSE
Muscle	GO:0070856	myosin VI light chain binding	FALSE	FALSE
Muscle	GO:0070938	contractile ring	TRUE	TRUE
Muscle	GO:0071340	skeletal muscle acetylcholine-gated channel clustering	TRUE	TRUE
Muscle	GO:0071342	regulation of establishment of actomyosin contractile ring localization	FALSE	FALSE
Muscle	GO:0071343	negative regulation of establishment of actomyosin contractile ring localization	FALSE	FALSE
Muscle	GO:0071519	actin filament bundle assembly involved in cytokinetic actomyosin contractile ring assembly	FALSE	FALSE
Muscle	GO:0071520	actin filament bundle convergence involved in cytokinetic actomyosin contractile ring assembly	FALSE	FALSE
Muscle	GO:0071670	smooth muscle cell chemotaxis	TRUE	FALSE
Muscle	GO:0071671	regulation of smooth muscle cell chemotaxis	FALSE	FALSE
Muscle	GO:0071672	negative regulation of smooth muscle cell chemotaxis	FALSE	TRUE
Muscle	GO:0071673	positive regulation of smooth muscle cell chemotaxis	TRUE	TRUE
Muscle	GO:0071688	striated muscle myosin thick filament assembly	FALSE	FALSE
Muscle	GO:0071689	muscle thin filament assembly	FALSE	FALSE
Muscle	GO:0071690	cardiac muscle myosin thick filament assembly	FALSE	FALSE
Muscle	GO:0071691	cardiac muscle thin filament assembly	FALSE	TRUE
Muscle	GO:0072191	ureter smooth muscle development	FALSE	FALSE
Muscle	GO:0072193	ureter smooth muscle cell differentiation	TRUE	TRUE
Muscle	GO:0072194	kidney smooth muscle tissue development	FALSE	FALSE
Muscle	GO:0072195	kidney smooth muscle cell differentiation	TRUE	TRUE
Muscle	GO:0072208	metanephric smooth muscle tissue development	FALSE	TRUE
Muscle	GO:0080115	myosin XI tail binding	FALSE	FALSE
Muscle	GO:0086001	regulation of cardiac muscle cell action potential	TRUE	FALSE
Muscle	GO:0086002	regulation of cardiac muscle cell action potential involved in contraction	TRUE	FALSE
Muscle	GO:0086003	cardiac muscle cell contraction	FALSE	FALSE
Muscle	GO:0086004	regulation of cardiac muscle cell contraction	TRUE	FALSE
Muscle	GO:0086005	regulation of ventricular cardiac muscle cell action potential	TRUE	FALSE
Muscle	GO:0086006	voltage-gated sodium channel activity involved in regulation of cardiac muscle cell action potential	TRUE	FALSE
Muscle	GO:0086007	voltage-gated calcium channel activity involved in regulation of cardiac muscle cell action potential	FALSE	FALSE
Muscle	GO:0086008	voltage-gated potassium channel activity involved in cardiac muscle cell action potential repolarization	FALSE	FALSE
Muscle	GO:0086012	membrane depolarization involved in regulation of cardiac muscle cell action potential	TRUE	FALSE
Muscle	GO:0086013	membrane repolarization involved in regulation of cardiac muscle cell action potential	FALSE	FALSE
Muscle	GO:0086014	regulation of atrial cardiac muscle cell action potential	FALSE	FALSE
Muscle	GO:0086017	regulation of Purkinje myocyte action potential	FALSE	FALSE
Muscle	GO:0086018	SA node cell to atrial cardiac muscle cell signalling	FALSE	FALSE
Muscle	GO:0086020	gap junction channel activity involved in SA node cell-atrial cardiac muscle cell electrical coupling	FALSE	FALSE
Muscle	GO:0086021	SA node cell to atrial cardiac muscle cell communication by electrical coupling	FALSE	FALSE
Muscle	GO:0086022	SA node cell-atrial cardiac muscle cell adhesion involved in cell communication	FALSE	FALSE
Muscle	GO:0086026	atrial cardiac muscle cell to AV node cell signaling	FALSE	FALSE
Muscle	GO:0086028	bundle of His cell to Purkinje myocyte signaling	FALSE	FALSE
Muscle	GO:0086029	Purkinje myocyte to ventricular cardiac muscle cell signaling	FALSE	FALSE
Muscle	GO:0086030	adrenergic receptor signaling pathway involved in cardiac muscle relaxation	FALSE	FALSE
Muscle	GO:0086036	regulation of cardiac muscle cell membrane potential	TRUE	FALSE
Muscle	GO:0086037	sodium:potassium-exchanging ATPase activity involved in regulation of cardiac muscle cell membrane potential	FALSE	FALSE
Muscle	GO:0086038	calcium:sodium antiporter activity involved in regulation of cardiac muscle cell membrane potential	FALSE	FALSE
Muscle	GO:0086039	calcium-transporting ATPase activity involved in regulation of cardiac muscle cell membrane potential	FALSE	FALSE
Muscle	GO:0086040	sodium:hydrogen antiporter activity involved in regulation of cardiac muscle cell membrane potential	FALSE	FALSE
Muscle	GO:0086042	cardiac muscle cell-cardiac muscle cell adhesion	FALSE	FALSE
Muscle	GO:0086044	atrial cardiac muscle cell to AV node cell communication by electrical coupling	FALSE	FALSE
Muscle	GO:0086047	membrane depolarization involved in regulation of Purkinje myocyte cell action potential	FALSE	FALSE
Muscle	GO:0086051	membrane repolarization involved in regulation of Purkinje myocyte action potential	FALSE	FALSE
Muscle	GO:0086054	bundle of His cell to Purkinje myocyte communication by electrical coupling	FALSE	FALSE
Muscle	GO:0086055	Purkinje myocyte to ventricular cardiac muscle cell communication by electrical coupling	FALSE	FALSE
Muscle	GO:0086058	voltage-gated calcium channel activity involved in regulation of Purkinje myocyte cell action potential	FALSE	FALSE
Muscle	GO:0086062	voltage-gated sodium channel activity involved in regulation of Purkinje myocyte action potential	FALSE	FALSE
Muscle	GO:0086066	atrial cardiac muscle cell to AV node cell communication	FALSE	FALSE
Muscle	GO:0086068	Purkinje myocyte to ventricular cardiac muscle cell communication	FALSE	FALSE
Muscle	GO:0086069	bundle of His cell to Purkinje myocyte communication	TRUE	FALSE
Muscle	GO:0086070	SA node cell to atrial cardiac muscle cell communication	FALSE	FALSE
Muscle	GO:0086071	atrial cardiac muscle cell-AV node cell adhesion involved in cell communication	FALSE	FALSE
Muscle	GO:0086073	bundle of His cell-Purkinje myocyte adhesion involved in cell communication	FALSE	FALSE
Muscle	GO:0086074	Purkinje myocyte-ventricular cardiac muscle cell adhesion involved in cell communication	FALSE	FALSE
Muscle	GO:0086076	gap junction channel activity involved in atrial cardiac muscle cell-AV node cell electrical coupling	FALSE	FALSE
Muscle	GO:0086078	gap junction channel activity involved in bundle of His cell-Purkinje myocyte electrical coupling	FALSE	FALSE
Muscle	GO:0086079	gap junction channel activity involved in Purkinje myocyte-ventricular cardiac muscle cell electrical coupling	FALSE	FALSE
Muscle	GO:0086081	cell adhesive protein binding involved in atrial cardiac muscle cell-AV node cell communication	FALSE	FALSE
Muscle	GO:0086083	cell adhesive protein binding involved in bundle of His cell-Purkinje myocyte communication	FALSE	FALSE
Muscle	GO:0086084	cell adhesive protein binding involved in Purkinje myocyte-ventricular cardiac muscle cell communication	FALSE	FALSE
Muscle	GO:0086085	cell adhesive protein binding involved in SA cardiac muscle cell-atrial cardiac muscle cell communication	FALSE	FALSE
Muscle	GO:0086088	voltage-gated potassium channel activity involved in Purkinje myocyte action potential repolarization	FALSE	FALSE
Muscle	GO:0086089	voltage-gated potassium channel activity involved in atrial cardiac muscle cell action potential repolarization	FALSE	FALSE
Muscle	GO:0086094	positive regulation of ryanodine-sensitive calcium-release channel activity by adrenergic receptor signaling pathway involved in positive regulation of cardiac muscle contraction	FALSE	FALSE
Muscle	GO:0090075	relaxation of muscle	FALSE	FALSE
Muscle	GO:0090076	relaxation of skeletal muscle	FALSE	TRUE
Muscle	GO:0090078	smooth muscle derived foam cell differentiation	FALSE	FALSE
Muscle	GO:0090257	regulation of muscle system process	FALSE	FALSE
Muscle	GO:0097081	vascular smooth muscle cell fate commitment	FALSE	FALSE
Muscle	GO:0097082	vascular smooth muscle cell fate specification	FALSE	FALSE
Muscle	GO:0097083	vascular smooth muscle cell fate determination	FALSE	FALSE
Muscle	GO:0097084	vascular smooth muscle cell development	FALSE	TRUE
Muscle	GO:0097357	myo-inositol import into cell	FALSE	FALSE
Muscle	GO:0097365	stretch-activated, cation-selective, calcium channel activity involved in regulation of cardiac muscle cell action potential	FALSE	FALSE
Muscle	GO:0097482	muscle cell postsynaptic density	FALSE	FALSE
Muscle	GO:0097512	cardiac myofibril	FALSE	FALSE
Muscle	GO:0097513	myosin II filament	FALSE	FALSE
Muscle	GO:0097517	contractile actin filament bundle	FALSE	FALSE
Muscle	GO:0098522	neuromuscular junction of skeletal muscle fiber	FALSE	FALSE
Muscle	GO:0098523	neuromuscular junction of myotube	FALSE	FALSE
Muscle	GO:0098524	neuromuscular junction of somatic muscle myotube	FALSE	FALSE
Muscle	GO:0098525	excitatory neuromuscular junction of somatic myotube	FALSE	FALSE
Muscle	GO:0098526	inhibitory neuromuscular junction of somatic myotube	FALSE	FALSE
Muscle	GO:0098527	neuromuscular junction of somatic muscle	FALSE	FALSE
Muscle	GO:0098528	skeletal muscle fiber differentiation	FALSE	FALSE
Muscle	GO:0098529	neuromuscular junction development, skeletal muscle fiber	FALSE	FALSE
Muscle	GO:1900719	regulation of uterine smooth muscle relaxation	FALSE	FALSE
Muscle	GO:1900720	negative regulation of uterine smooth muscle relaxation	FALSE	FALSE
Muscle	GO:1900721	positive regulation of uterine smooth muscle relaxation	FALSE	FALSE
Muscle	GO:1900825	regulation of membrane depolarization involved in regulation of cardiac muscle cell action potential	FALSE	FALSE
Muscle	GO:1900826	negative regulation of membrane depolarization involved in regulation of cardiac muscle cell action potential	FALSE	FALSE
Muscle	GO:1900827	positive regulation of membrane depolarization involved in regulation of cardiac muscle cell action potential	TRUE	FALSE
Muscle	GO:1901052	sarcosine metabolic process	FALSE	FALSE
Muscle	GO:1901053	sarcosine catabolic process	FALSE	FALSE
Muscle	GO:1901054	sarcosine biosynthetic process	FALSE	FALSE
Muscle	GO:1901077	regulation of relaxation of muscle	TRUE	FALSE
Muscle	GO:1901078	negative regulation of relaxation of muscle	FALSE	FALSE
Muscle	GO:1901079	positive regulation of relaxation of muscle	FALSE	FALSE
Muscle	GO:1901080	regulation of relaxation of smooth muscle	FALSE	FALSE
Muscle	GO:1901081	negative regulation of relaxation of smooth muscle	FALSE	FALSE
Muscle	GO:1901082	positive regulation of relaxation of smooth muscle	FALSE	FALSE
Muscle	GO:1901295	regulation of canonical Wnt receptor signaling pathway involved in cardiac muscle cell fate commitment	FALSE	FALSE
Muscle	GO:1901296	negative regulation of canonical Wnt receptor signaling pathway involved in cardiac muscle cell fate commitment	TRUE	FALSE
Muscle	GO:1901297	positive regulation of canonical Wnt receptor signaling pathway involved in cardiac muscle cell fate commitment	FALSE	FALSE
Muscle	GO:1901648	regulation of actomyosin contractile ring localization	FALSE	FALSE
Muscle	GO:1901649	negative regulation of actomyosin contractile ring localization	FALSE	FALSE
Muscle	GO:1901650	positive regulation of actomyosin contractile ring localization	FALSE	FALSE
Muscle	GO:1901667	negative regulation of satellite cell activation involved in skeletal muscle regeneration	FALSE	FALSE
Muscle	GO:1901739	regulation of myoblast fusion	FALSE	FALSE
Muscle	GO:1901740	negative regulation of myoblast fusion	FALSE	FALSE
Muscle	GO:1901741	positive regulation of myoblast fusion	FALSE	FALSE
Muscle	GO:1901861	regulation of muscle tissue development	FALSE	FALSE
Muscle	GO:1901862	negative regulation of muscle tissue development	FALSE	FALSE
Muscle	GO:1901863	positive regulation of muscle tissue development	FALSE	FALSE
Muscle	GO:1901897	regulation of relaxation of cardiac muscle	TRUE	FALSE
Muscle	GO:1901898	negative regulation of relaxation of cardiac muscle	FALSE	FALSE
Muscle	GO:1901899	positive regulation of relaxation of cardiac muscle	FALSE	FALSE
Muscle	GO:1902080	regulation of calcium ion import into sarcoplasmic reticulum	FALSE	FALSE
Muscle	GO:1902081	negative regulation of calcium ion import into sarcoplasmic reticulum	TRUE	FALSE
Muscle	GO:1902082	positive regulation of calcium ion import into sarcoplasmic reticulum	FALSE	FALSE
Muscle	GO:1902282	voltage-gated potassium channel activity involved in ventricular cardiac muscle cell action potential repolarization	FALSE	FALSE
Muscle	GO:1902404	mitotic actomyosin contractile ring contraction	FALSE	FALSE
Muscle	GO:1902405	mitotic actomyosin contractile ring localization	FALSE	FALSE
Muscle	GO:1902406	mitotic actomyosin contractile ring maintenance	FALSE	FALSE
Muscle	GO:1902407	assembly of actomyosin apparatus involved in mitotic cytokinesis	FALSE	FALSE
Muscle	GO:1902471	regulation of mitotic actomyosin contractile ring localization	FALSE	FALSE
Muscle	GO:1990036	calcium ion import into sarcoplasmic reticulum	FALSE	FALSE
Muscle	GO:1990179	protein localization to actomyosin contractile ring	FALSE	FALSE
Muscle	GO:2000061	regulation of ureter smooth muscle cell differentiation	FALSE	FALSE
Muscle	GO:2000062	negative regulation of ureter smooth muscle cell differentiation	FALSE	TRUE
Muscle	GO:2000063	positive regulation of ureter smooth muscle cell differentiation	FALSE	TRUE
Muscle	GO:2000097	regulation of smooth muscle cell-matrix adhesion	FALSE	TRUE
Muscle	GO:2000098	negative regulation of smooth muscle cell-matrix adhesion	FALSE	TRUE
Muscle	GO:2000150	regulation of planar cell polarity pathway involved in cardiac muscle tissue morphogenesis	FALSE	FALSE
Muscle	GO:2000151	negative regulation of planar cell polarity pathway involved in cardiac muscle tissue morphogenesis	FALSE	TRUE
Muscle	GO:2000287	positive regulation of myotome development	FALSE	FALSE
Muscle	GO:2000288	positive regulation of myoblast proliferation	TRUE	TRUE
Muscle	GO:2000290	regulation of myotome development	FALSE	FALSE
Muscle	GO:2000291	regulation of myoblast proliferation	FALSE	FALSE
Muscle	GO:2000356	regulation of kidney smooth muscle cell differentiation	FALSE	FALSE
Muscle	GO:2000357	negative regulation of kidney smooth muscle cell differentiation	FALSE	TRUE
Muscle	GO:2000358	positive regulation of kidney smooth muscle cell differentiation	FALSE	TRUE
Muscle	GO:2000431	regulation of cytokinesis, actomyosin contractile ring assembly	FALSE	FALSE
Muscle	GO:2000432	negative regulation of cytokinesis, actomyosin contractile ring assembly	FALSE	FALSE
Muscle	GO:2000433	positive regulation of cytokinesis, actomyosin contractile ring assembly	FALSE	FALSE
Muscle	GO:2000689	actin filament organization involved in cytokinetic actomyosin contractile ring assembly	FALSE	FALSE
Muscle	GO:2000690	regulation of cardiac muscle cell myoblast differentiation	FALSE	FALSE
Muscle	GO:2000691	negative regulation of cardiac muscle cell myoblast differentiation	FALSE	TRUE
Muscle	GO:2000700	positive regulation of cardiac muscle cell myoblast differentiation	FALSE	FALSE
Muscle	GO:2000708	myosin filament organization involved in cytokinetic actomyosin contractile ring assembly	FALSE	FALSE
Muscle	GO:2000721	positive regulation of transcription from RNA polymerase II promoter involved in smooth muscle cell differentiation	TRUE	TRUE
Muscle	GO:2000722	regulation of cardiac vascular smooth muscle cell differentiation	FALSE	FALSE
Muscle	GO:2000723	negative regulation of cardiac vascular smooth muscle cell differentiation	FALSE	FALSE
Muscle	GO:2000724	positive regulation of cardiac vascular smooth muscle cell differentiation	FALSE	FALSE
Muscle	GO:2000725	regulation of cardiac muscle cell differentiation	FALSE	FALSE
Muscle	GO:2000726	negative regulation of cardiac muscle cell differentiation	TRUE	TRUE
Muscle	GO:2000727	positive regulation of cardiac muscle cell differentiation	TRUE	TRUE
Muscle	GO:2000745	positive regulation of transcription from RNA polymerase III promoter involved in smooth muscle cell differentiation	FALSE	FALSE
Muscle	GO:2000818	negative regulation of myoblast proliferation	FALSE	FALSE
Muscle	GO:2000820	negative regulation of transcription from RNA polymerase II promoter involved in smooth muscle cell differentiation	FALSE	TRUE
Muscle	GO:2001014	regulation of skeletal muscle cell differentiation	TRUE	TRUE
Muscle	GO:2001015	negative regulation of skeletal muscle cell differentiation	FALSE	TRUE
Muscle	GO:2001016	positive regulation of skeletal muscle cell differentiation	FALSE	TRUE
Muscle	GO:2001035	regulation of tongue muscle cell differentiation	FALSE	FALSE
Muscle	GO:2001036	negative regulation of tongue muscle cell differentiation	FALSE	FALSE
Muscle	GO:2001037	positive regulation of tongue muscle cell differentiation	TRUE	TRUE
Muscle	GO:2001281	regulation of muscle cell chemotaxis toward tendon cell	FALSE	FALSE
Muscle	GO:2001282	negative regulation of muscle cell chemotaxis toward tendon cell	FALSE	FALSE
Muscle	GO:2001283	Roundabout signaling pathway involved in muscle cell chemotaxis toward tendon cell	FALSE	FALSE
Stem cell	GO:0002174	mammary stem cell proliferation	FALSE	FALSE
Stem cell	GO:0005020	stem cell factor receptor activity	FALSE	TRUE
Stem cell	GO:0005173	stem cell factor receptor binding	FALSE	TRUE
Stem cell	GO:0007639	homeostasis of number of meristem cells	FALSE	FALSE
Stem cell	GO:0017145	stem cell division	TRUE	TRUE
Stem cell	GO:0019827	stem cell maintenance	TRUE	TRUE
Stem cell	GO:0021898	commitment of multipotent stem cells to neuronal lineage in forebrain	FALSE	FALSE
Stem cell	GO:0030718	germ-line stem cell maintenance	FALSE	TRUE
Stem cell	GO:0035019	somatic stem cell maintenance	TRUE	TRUE
Stem cell	GO:0035701	hematopoietic stem cell migration	FALSE	FALSE
Stem cell	GO:0036098	male germ-line stem cell maintenance	FALSE	FALSE
Stem cell	GO:0036099	female germ-line stem cell maintenance	FALSE	FALSE
Stem cell	GO:0036215	response to stem cell factor stimulus	FALSE	FALSE
Stem cell	GO:0036216	cellular response to stem cell factor stimulus	FALSE	FALSE
Stem cell	GO:0036334	epidermal stem cell homeostasis	FALSE	FALSE
Stem cell	GO:0036335	intestinal stem cell homeostasis	FALSE	FALSE
Stem cell	GO:0036445	neuronal stem cell division	FALSE	FALSE
Stem cell	GO:0042078	germ-line stem cell division	FALSE	FALSE
Stem cell	GO:0044338	canonical Wnt receptor signaling pathway involved in mesenchymal stem cell differentiation	FALSE	TRUE
Stem cell	GO:0048103	somatic stem cell division	TRUE	TRUE
Stem cell	GO:0048132	female germ-line stem cell division	FALSE	FALSE
Stem cell	GO:0048133	male germ-line stem cell division	FALSE	TRUE
Stem cell	GO:0048863	stem cell differentiation	TRUE	TRUE
Stem cell	GO:0048864	stem cell development	TRUE	TRUE
Stem cell	GO:0048865	stem cell fate commitment	FALSE	FALSE
Stem cell	GO:0048866	stem cell fate specification	FALSE	TRUE
Stem cell	GO:0048867	stem cell fate determination	FALSE	FALSE
Stem cell	GO:0060218	hematopoietic stem cell differentiation	TRUE	TRUE
Stem cell	GO:0060529	squamous basal epithelial stem cell differentiation involved in prostate gland acinus development	TRUE	TRUE
Stem cell	GO:0060932	His-Purkinje system cell differentiation	FALSE	FALSE
Stem cell	GO:0060933	His-Purkinje system cell development	FALSE	FALSE
Stem cell	GO:0060934	His-Purkinje system cell fate commitment	FALSE	FALSE
Stem cell	GO:0061235	mesenchymal stem cell maintenance involved in mesonephric nephron morphogenesis	FALSE	FALSE
Stem cell	GO:0061239	mesenchymal stem cell differentiation involved in mesonephric nephron morphogenesis	FALSE	FALSE
Stem cell	GO:0061456	mesenchymal stem cell migration involved in uteric bud morphogenesis	FALSE	FALSE
Stem cell	GO:0061484	hematopoietic stem cell homeostasis	FALSE	FALSE
Stem cell	GO:0071425	hematopoietic stem cell proliferation	TRUE	TRUE
Stem cell	GO:0072037	mesenchymal stem cell differentiation involved in nephron morphogenesis	FALSE	FALSE
Stem cell	GO:0072038	mesenchymal stem cell maintenance involved in nephron morphogenesis	FALSE	FALSE
Stem cell	GO:0072042	regulation of mesenchymal stem cell proliferation involved in nephron morphogenesis	FALSE	FALSE
Stem cell	GO:0072089	stem cell proliferation	TRUE	TRUE
Stem cell	GO:0072090	mesenchymal stem cell proliferation involved in nephron morphogenesis	FALSE	FALSE
Stem cell	GO:0072091	regulation of stem cell proliferation	FALSE	TRUE
Stem cell	GO:0072281	mesenchymal stem cell differentiation involved in metanephric nephron morphogenesis	FALSE	FALSE
Stem cell	GO:0072309	mesenchymal stem cell maintenance involved in metanephric nephron morphogenesis	FALSE	FALSE
Stem cell	GO:0072497	mesenchymal stem cell differentiation	FALSE	FALSE
Stem cell	GO:0097086	amniotic stem cell differentiation	FALSE	FALSE
Stem cell	GO:0097150	neuronal stem cell maintenance	TRUE	TRUE
Stem cell	GO:0097168	mesenchymal stem cell proliferation	FALSE	FALSE
Stem cell	GO:0097241	hematopoietic stem cell migration to bone marrow	FALSE	FALSE
Stem cell	GO:1902033	regulation of hematopoietic stem cell proliferation	FALSE	FALSE
Stem cell	GO:1902034	negative regulation of hematopoietic stem cell proliferation	FALSE	FALSE
Stem cell	GO:1902035	positive regulation of hematopoietic stem cell proliferation	FALSE	FALSE
Stem cell	GO:1902036	regulation of hematopoietic stem cell differentiation	FALSE	FALSE
Stem cell	GO:1902037	negative regulation of hematopoietic stem cell differentiation	FALSE	FALSE
Stem cell	GO:1902038	positive regulation of hematopoietic stem cell differentiation	FALSE	FALSE
Stem cell	GO:1902455	negative regulation of stem cell maintenance	FALSE	FALSE
Stem cell	GO:1902459	positive regulation of stem cell maintenance	FALSE	FALSE
Stem cell	GO:1902460	regulation of mesenchymal stem cell proliferation	FALSE	FALSE
Stem cell	GO:1902461	negative regulation of mesenchymal stem cell proliferation	FALSE	FALSE
Stem cell	GO:1902462	positive regulation of mesenchymal stem cell proliferation	FALSE	FALSE
Stem cell	GO:2000035	regulation of stem cell division	FALSE	TRUE
Stem cell	GO:2000036	regulation of stem cell maintenance	TRUE	TRUE
Stem cell	GO:2000101	regulation of mammary stem cell proliferation	FALSE	FALSE
Stem cell	GO:2000102	negative regulation of mammary stem cell proliferation	FALSE	FALSE
Stem cell	GO:2000103	positive regulation of mammary stem cell proliferation	FALSE	FALSE
Stem cell	GO:2000471	regulation of hematopoietic stem cell migration	FALSE	FALSE
Stem cell	GO:2000472	negative regulation of hematopoietic stem cell migration	FALSE	FALSE
Stem cell	GO:2000473	positive regulation of hematopoietic stem cell migration	FALSE	TRUE
Stem cell	GO:2000647	negative regulation of stem cell proliferation	FALSE	TRUE
Stem cell	GO:2000648	positive regulation of stem cell proliferation	TRUE	TRUE
Stem cell	GO:2000736	regulation of stem cell differentiation	FALSE	FALSE
Stem cell	GO:2000737	negative regulation of stem cell differentiation	TRUE	TRUE
Stem cell	GO:2000738	positive regulation of stem cell differentiation	TRUE	FALSE
Stem cell	GO:2000739	regulation of mesenchymal stem cell differentiation	FALSE	TRUE
Stem cell	GO:2000740	negative regulation of mesenchymal stem cell differentiation	FALSE	TRUE
Stem cell	GO:2000741	positive regulation of mesenchymal stem cell differentiation	TRUE	TRUE
Stem cell	GO:2000797	regulation of amniotic stem cell differentiation	FALSE	FALSE
Stem cell	GO:2000798	negative regulation of amniotic stem cell differentiation	FALSE	TRUE
Stem cell	GO:2000799	positive regulation of amniotic stem cell differentiation	FALSE	FALSE
Fibroblast	GO:0001571	non-tyrosine kinase fibroblast growth factor receptor activity	FALSE	TRUE
Fibroblast	GO:0003135	fibroblast growth factor receptor signaling pathway involved in heart induction	FALSE	FALSE
Fibroblast	GO:0003268	fibroblast growth factor receptor signaling pathway involved in regulation of secondary heart field cardioblast proliferation	FALSE	FALSE
Fibroblast	GO:0005007	fibroblast growth factor-activated receptor activity	FALSE	TRUE
Fibroblast	GO:0005104	fibroblast growth factor receptor binding	FALSE	TRUE
Fibroblast	GO:0005105	type 1 fibroblast growth factor receptor binding	FALSE	TRUE
Fibroblast	GO:0005111	type 2 fibroblast growth factor receptor binding	FALSE	TRUE
Fibroblast	GO:0008543	fibroblast growth factor receptor signaling pathway	FALSE	TRUE
Fibroblast	GO:0010761	fibroblast migration	FALSE	TRUE
Fibroblast	GO:0010762	regulation of fibroblast migration	FALSE	FALSE
Fibroblast	GO:0010763	positive regulation of fibroblast migration	FALSE	TRUE
Fibroblast	GO:0010764	negative regulation of fibroblast migration	FALSE	TRUE
Fibroblast	GO:0017134	fibroblast growth factor binding	FALSE	TRUE
Fibroblast	GO:0021875	fibroblast growth factor receptor signaling pathway involved in forebrain neuroblast division	FALSE	FALSE
Fibroblast	GO:0021899	fibroblast growth factor receptor signaling pathway involved in forebrain neuron fate commitment	FALSE	FALSE
Fibroblast	GO:0021907	fibroblast growth factor receptor signaling pathway involved in spinal cord anterior/posterior pattern formation	FALSE	FALSE
Fibroblast	GO:0022003	negative regulation of anterior neural cell fate commitment of the neural plate by fibroblast growth factor receptor signaling pathway	FALSE	FALSE
Fibroblast	GO:0030353	fibroblast growth factor receptor antagonist activity	FALSE	FALSE
Fibroblast	GO:0035602	fibroblast growth factor receptor signaling pathway involved in negative regulation of apoptotic process in bone marrow	FALSE	FALSE
Fibroblast	GO:0035603	fibroblast growth factor receptor signaling pathway involved in hemopoiesis	FALSE	FALSE
Fibroblast	GO:0035604	fibroblast growth factor receptor signaling pathway involved in positive regulation of cell proliferation in bone marrow	FALSE	FALSE
Fibroblast	GO:0035607	fibroblast growth factor receptor signaling pathway involved in orbitofrontal cortex development	FALSE	TRUE
Fibroblast	GO:0035766	cell chemotaxis to fibroblast growth factor	FALSE	FALSE
Fibroblast	GO:0035768	endothelial cell chemotaxis to fibroblast growth factor	FALSE	TRUE
Fibroblast	GO:0036446	myofibroblast differentiation	FALSE	FALSE
Fibroblast	GO:0040036	regulation of fibroblast growth factor receptor signaling pathway	FALSE	TRUE
Fibroblast	GO:0040037	negative regulation of fibroblast growth factor receptor signaling pathway	FALSE	TRUE
Fibroblast	GO:0044344	cellular response to fibroblast growth factor stimulus	FALSE	TRUE
Fibroblast	GO:0044346	fibroblast apoptotic process	FALSE	FALSE
Fibroblast	GO:0045743	positive regulation of fibroblast growth factor receptor signaling pathway	FALSE	TRUE
Fibroblast	GO:0048144	fibroblast proliferation	FALSE	TRUE
Fibroblast	GO:0048145	regulation of fibroblast proliferation	FALSE	TRUE
Fibroblast	GO:0048146	positive regulation of fibroblast proliferation	FALSE	TRUE
Fibroblast	GO:0048147	negative regulation of fibroblast proliferation	FALSE	TRUE
Fibroblast	GO:0060499	fibroblast growth factor receptor signaling pathway involved in lung induction	FALSE	FALSE
Fibroblast	GO:0060595	fibroblast growth factor receptor signaling pathway involved in mammary gland specification	FALSE	TRUE
Fibroblast	GO:0060787	positive regulation of posterior neural plate formation by fibroblast growth factor receptor signaling pathway	FALSE	FALSE
Fibroblast	GO:0060825	fibroblast growth factor receptor signaling pathway involved in neural plate anterior/posterior pattern formation	FALSE	FALSE
Fibroblast	GO:0060935	cardiac fibroblast cell differentiation	FALSE	FALSE
Fibroblast	GO:0060936	cardiac fibroblast cell development	FALSE	FALSE
Fibroblast	GO:0060937	cardiac fibroblast cell fate commitment	FALSE	FALSE
Fibroblast	GO:0060938	epicardium-derived cardiac fibroblast cell differentiation	FALSE	FALSE
Fibroblast	GO:0060939	epicardium-derived cardiac fibroblast cell development	FALSE	FALSE
Fibroblast	GO:0060940	epithelial to mesenchymal transition involved in cardiac fibroblast development	FALSE	FALSE
Fibroblast	GO:0060941	epicardium-derived cardiac fibroblast cell fate commitment	FALSE	FALSE
Fibroblast	GO:0060942	neural crest-derived cardiac fibroblast cell differentiation	FALSE	FALSE
Fibroblast	GO:0060943	neural crest-derived cardiac fibroblast cell development	FALSE	FALSE
Fibroblast	GO:0060944	neural crest-derived cardiac fibroblast cell fate commitment	FALSE	FALSE
Fibroblast	GO:0061313	fibroblast growth factor receptor signaling pathway involved in heart development	FALSE	FALSE
Fibroblast	GO:0061385	fibroblast proliferation involved in heart morphogenesis	FALSE	FALSE
Fibroblast	GO:0071774	response to fibroblast growth factor stimulus	FALSE	FALSE
Fibroblast	GO:0072537	fibroblast activation	FALSE	TRUE
Fibroblast	GO:0090080	positive regulation of MAPKKK cascade by fibroblast growth factor receptor signaling pathway	FALSE	TRUE
Fibroblast	GO:0090243	fibroblast growth factor receptor signaling pathway involved in somitogenesis	FALSE	FALSE
Fibroblast	GO:0090269	fibroblast growth factor production	FALSE	FALSE
Fibroblast	GO:0090270	regulation of fibroblast growth factor production	FALSE	FALSE
Fibroblast	GO:0090271	positive regulation of fibroblast growth factor production	FALSE	TRUE
Fibroblast	GO:0090272	negative regulation of fibroblast growth factor production	FALSE	TRUE
Fibroblast	GO:1902178	fibroblast growth factor receptor apoptotic signaling pathway	FALSE	FALSE
Fibroblast	GO:2000269	regulation of fibroblast apoptotic process	FALSE	FALSE
Fibroblast	GO:2000270	negative regulation of fibroblast apoptotic process	FALSE	TRUE
Fibroblast	GO:2000271	positive regulation of fibroblast apoptotic process	FALSE	TRUE
Fibroblast	GO:2000313	regulation of fibroblast growth factor receptor signaling pathway involved in neural plate anterior/posterior pattern formation	FALSE	FALSE
Fibroblast	GO:2000314	negative regulation of fibroblast growth factor receptor signaling pathway involved in neural plate anterior/posterior pattern formation	FALSE	FALSE
Fibroblast	GO:2000315	positive regulation of fibroblast growth factor receptor signaling pathway involved in neural plate anterior/posterior pattern formation	FALSE	FALSE
Fibroblast	GO:2000544	regulation of endothelial cell chemotaxis to fibroblast growth factor	FALSE	FALSE
Fibroblast	GO:2000545	negative regulation of endothelial cell chemotaxis to fibroblast growth factor	FALSE	FALSE
Fibroblast	GO:2000546	positive regulation of endothelial cell chemotaxis to fibroblast growth factor	FALSE	FALSE
Fibroblast	GO:2000699	fibroblast growth factor receptor signaling pathway involved in ureteric bud formation	FALSE	FALSE
Fibroblast	GO:2000702	regulation of fibroblast growth factor receptor signaling pathway involved in ureteric bud formation	FALSE	FALSE
Fibroblast	GO:2000703	negative regulation of fibroblast growth factor receptor signaling pathway involved in ureteric bud formation	FALSE	TRUE
Fibroblast	GO:2000704	positive regulation of fibroblast growth factor receptor signaling pathway involved in ureteric bud formation	FALSE	FALSE
