# Supplementary material for: Widespread intron retention in mammals functionally tunes transcriptomes
Source: HighWire-hosted journal article supplement (doi:10.1101/gr.177790.114), 2014-09-25
Supplement: TableS4_ChromatinDatasets_UB140624.xlsx [file TableS4_ChromatinDatasets_UB140624.xlsx]

## Sheet: K562
ChIP-Seq profiles in K562 cells shown in Fig. 6, Supplementary Fig. S8
Feature	Experimental	Input
BHLHE40	GSM935616	GSM935618
c-MYC	GSM935516	GSM935618
CHD2	GSM935502	GSM935618
CTCF	GSM935407	GSM935618
H3K27ac	GSM733656	GSM733780
H3K36me3	GSM733714	GSM733780
H3K4me3	GSM733680	GSM733780
PolII-Ser2p	GSM935402	GSM935618
PolIII	GSM935358	GSM935363
SMC3	GSM935310	GSM935618

## Sheet: CH12
ChIP-Seq profiles in CH12 cells shown in Supplementary Fig. S8
Feature	Experimental	Input
Bhlhe40	GSM912922	GSM912917
c-Myc	GSM912906	GSM912917
Chd2	GSM912926	GSM912917
CTCF	GSM912909	GSM912917
H3K27ac	GSM1000117	GSM1000118
H3K36me3	GSM946530	GSM946521
H3K4me3	GSM946528	GSM946521
PolII-Ser2p	GSM912931	GSM912917
PolIII	GSM912891	GSM912918
Smc3	GSM912930	GSM912917

## Sheet: HeLa
ChIP-Seq profiles in HeLa cells shown in Fig. 6
Feature	Experimental	Input
PolII-Ser2p	GSM935383	GSM935339
