# Supplementary material for: Widespread intron retention in mammals functionally tunes transcriptomes
Source: HighWire-hosted journal article supplement (doi:10.1101/gr.177790.114), 2014-09-25
Supplement: TableS5_GenomeAnnotations.xlsx [file TableS5_GenomeAnnotations.xlsx]

## Sheet: Table S3 - Genome,Transcriptome
Supplemental Table S5
Sources of genomic, transcriptomic and exonic/intronic annotations
Species	Genome assembly	Ensembl transcriptome	UCSC tables for exon/intron annotation
Human (Homo sapiens)	Feb. 2009 (hg19, GRCh37)	Homo_sapiens.GRCh37.65.cdna.all	refGene (RefSeq transcripts), knownGene (UCSC known gene transcripts)
Chimp (Pan troglodytes)	Mar. 2006 (panTro2)	Pan_troglodytes.CHIMP2.1.4.65.cdna.all	refGene (RefSeq transcripts), all_mrna (GenBank transcripts), ensGene (Ensembl transcripts)
Orangutan (Pongo abelii)	Jul. 2007 (ponAbe2)	Pongo_abelii.PPYG2.65.cdna.all.fa	refGene (RefSeq transcripts), all_mrna (GenBank transcripts), ensGene (Ensembl transcripts)
Macaque (Macaca mulatta)	Jan. 2006 (rheMac2)	Macaca_mulatta.MMUL_1.65.cdna.all.fa	refGene (RefSeq transcripts), all_mrna (GenBank transcripts), ensGene (Ensembl transcripts)
Mouse (Mus musculus)	Jul. 2007 (mm9)	Mus_musculus.NCBIM37.65.cdna.all.fa	refGene (RefSeq transcripts), knownGene (UCSC known gene transcripts)
Opossum (Monodelphis domestica)	Oct. 2006 (monDom5)	Monodelphis_domestica.BROADO5.65.cdna.all.fa	refGene (RefSeq transcripts), all_mrna (GenBank transcripts), ensGene (Ensembl transcripts)
Platypus (Ornithorhynchus anatinus)	Mar. 2007 (ornAna1)	Ornithorhynchus_anatinus.OANA5.65.cdna.all.fa	refGene (RefSeq transcripts), all_mrna (GenBank transcripts), ensGene (Ensembl transcripts)
Chicken (Gallus gallus)	May 2006 (galGal3)	Gallus_gallus.WASHUC2.64.cdna.all.fa	refGene (RefSeq transcripts), all_mrna (GenBank transcripts), ensGene (Ensembl transcripts)
Lizard (Anolis carolinensis)	May 2010 (anoCar2)	Anolis_carolinensis.AnoCar2.0.65.cdna.all.fa	all_mrna (GenBank transcripts), ensGene (Ensembl transcripts)
Frog (Xenopus tropicalis)	Aug. 2005 (xenTro2)	Xenopus_tropicalis.JGI_4.2.65.cdna.all.fa	refGene (RefSeq transcripts), all_mrna (GenBank transcripts), ensGene (Ensembl transcripts), mgcGenes (Mammalian Gene Collection transcripts)
Pufferfish (Tetraodon nigroviridis)	Mar. 2010 (tetNig2)	Tetraodon_nigroviridis.TETRAODON8.65.cdna.all.fa	all_mrna (GenBank transcripts), ensGene (Ensembl transcripts), gaze (Genoscope transcripts)
