# Supplementary material for: Widespread intron retention in mammals functionally tunes transcriptomes
Source: HighWire-hosted journal article supplement (doi:10.1101/gr.177790.114), 2014-09-25
Supplement: TableS11_PIR_MEF_Smg1_tab.zip [file TableS14_SampleGroupings.xlsx]

## Sheet: Human
	NEURAL Analysis		MUSC Analysis		ESC analysis
SAMPLE NAME	Subgroup	GROUP	Subgroup	GROUP	Subgroup	GROUP
Brain	Neural	NEURAL	Neural	OTHERS	Neural	OTHERS
Brain_Cortex_M	Neural	NEURAL	Neural	OTHERS	Neural	OTHERS
Brain_FrGyrus_o	Neural	NEURAL	Neural	OTHERS	Neural	OTHERS
Brain_FrGyrus_y	Neural	NEURAL	Neural	OTHERS	Neural	OTHERS
Brain_STG	Neural	NEURAL	Neural	OTHERS	Neural	OTHERS
Cerebellum_M	Neural	NEURAL	Neural	OTHERS	Neural	OTHERS
Heart_M	Muscular	OTHERS	Muscular	MUSCULAR	Muscular	OTHERS
Muscle	Muscular	OTHERS	Muscular	MUSCULAR	Muscular	OTHERS
Muscle_c	Muscular	OTHERS	Muscular	MUSCULAR	Muscular	OTHERS
ESC_H1a	ESC	OTHERS	ESC	OTHERS	ESC	ESC
ESC_H1cd	ESC	OTHERS	ESC	OTHERS	ESC	ESC
ESC_H1e	ESC	OTHERS	ESC	OTHERS	ESC	ESC
ESC_H1f	ESC	OTHERS	ESC	OTHERS	ESC	ESC
ESC_H9ac	ESC	OTHERS	ESC	OTHERS	ESC	ESC
ESC_H9d	ESC	OTHERS	ESC	OTHERS	ESC	ESC
ESC_HES2	ESC	OTHERS	ESC	OTHERS	ESC	ESC
iPSac	ESC	OTHERS	ESC	OTHERS	iPS	EXCLUDE
iPSd	ESC	OTHERS	ESC	OTHERS	iPS	EXCLUDE
Adipose_Breast	Adipose	OTHERS	Adipose	OTHERS	Adipose	OTHERS
Adrenal		OTHERS		OTHERS		OTHERS
Amnion		OTHERS		OTHERS		OTHERS
Chorion		OTHERS		OTHERS		OTHERS
CL_293T_cont		OTHERS		OTHERS		OTHERS
CL_Gm12878		OTHERS		OTHERS		OTHERS
CL_HeLa_cont		OTHERS		OTHERS		OTHERS
CL_K562		OTHERS		OTHERS		OTHERS
CL_MB231_ESRP_Cont		OTHERS		OTHERS		OTHERS
CL_Neurobl_RA		OTHERS		OTHERS		OTHERS
CL_PNT2_ESRP_Cont		OTHERS		OTHERS		OTHERS
Colon		OTHERS		OTHERS		OTHERS
Decidua		OTHERS		OTHERS		OTHERS
EndomStromalC_M		OTHERS		OTHERS		OTHERS
Endothelium		OTHERS		OTHERS		OTHERS
Fibr_M		OTHERS		OTHERS		OTHERS
GLS_cells_M		OTHERS		OTHERS		OTHERS
Kidney_M		OTHERS		OTHERS		OTHERS
Liver_M		OTHERS		OTHERS		OTHERS
Lung		OTHERS		OTHERS		OTHERS
Melanocytes		OTHERS		OTHERS		OTHERS
Ovary		OTHERS		OTHERS		OTHERS
Placenta		OTHERS		OTHERS		OTHERS
EpithelialCells	Epithelial	OTHERS	Epithelial	OTHERS	Epithelial	OTHERS
PlacentaEpiC_M	Epithelial	OTHERS	Epithelial	OTHERS	Epithelial	OTHERS
PREC_HFDPC		OTHERS		OTHERS		OTHERS
PREC_MSCab		OTHERS		OTHERS		OTHERS
Prostate		OTHERS		OTHERS		OTHERS
Testis_M		OTHERS		OTHERS		OTHERS
Thyroid		OTHERS		OTHERS		OTHERS
LymphNode	WBC_LymphNode	OTHERS	WBC_LymphNode	OTHERS	WBC_LymphNode	OTHERS
WBC_MC	WBC_LymphNode	OTHERS	WBC_LymphNode	OTHERS	WBC_LymphNode	OTHERS
PREC_NPC_cont	NPC	EXCLUDE	NPC	OTHERS	NPC	EXCLUDE
PREC_NPC_f	NPC	EXCLUDE	NPC	OTHERS	NPC	EXCLUDE
	32		33		32

## Sheet: Mouse
	NEURAL Analysis		MUSC Analysis		ESC analysis
SAMPLE NAME	Subgroup	GROUP	Subgroup	GROUP	Subgroup	GROUP
Brain_B12	Neural	NEURAL	Neural	OTHERS	Neural	OTHERS
Brain_BNP	Neural	NEURAL	Neural	OTHERS	Neural	OTHERS
Brain_Cortex_b	Neural	NEURAL	Neural	OTHERS	Neural	OTHERS
Brain_FrontalLobe	Neural	NEURAL	Neural	OTHERS	Neural	OTHERS
Cerebellum_EP	Neural	NEURAL	Neural	OTHERS	Neural	OTHERS
Retina_Eye	Neural	NEURAL	Neural	OTHERS	Neural	OTHERS
Neurons_M	Neural	NEURAL	Neural	OTHERS	Neural	OTHERS
Muscle_B12	Muscular	OTHERS	Muscular	MUSCULAR	Muscular	OTHERS
Muscle_BN	Muscular	OTHERS	Muscular	MUSCULAR	Muscular	OTHERS
Heart_BNP	Muscular	OTHERS	Muscular	MUSCULAR	Muscular	OTHERS
HeartE	Muscular	OTHERS	Muscular	MUSCULAR	Muscular	OTHERS
ESC_CGR8	ESC	OTHERS	ESC	OTHERS	ESC	ESC
ESC_D3	ESC	OTHERS	ESC	OTHERS	ESC	ESC
ESC_E14_M	ESC	OTHERS	ESC	OTHERS	ESC	ESC
ESC_J1	ESC	OTHERS	ESC	OTHERS	ESC	ESC
ESC_OS25_TT2	ESC	OTHERS	ESC	OTHERS	ESC	ESC
ESC_v65	ESC	OTHERS	ESC	OTHERS	ESC	ESC
iPS_ad	ESC	OTHERS	ESC	OTHERS	iPS	EXCLUDE
iPSb	ESC	OTHERS	ESC	OTHERS	iPS	EXCLUDE
AdrenalE		OTHERS		OTHERS		OTHERS
BladderE		OTHERS		OTHERS		OTHERS
CL_3T3		OTHERS		OTHERS		OTHERS
CL_CH12		OTHERS		OTHERS		OTHERS
CL_MEL		OTHERS		OTHERS		OTHERS
Oocyte_M	Oocyte	OTHERS	Oocyte	OTHERS	Oocyte	EXCLUDE
Embr_2C_M	Early_Embr	OTHERS	Early_Embr	OTHERS	2C	EXCLUDE
Embr_4C	Early_Embr	OTHERS	Early_Embr	OTHERS	4C	EXCLUDE
Embr_8C	Early_Embr	OTHERS	Early_Embr	OTHERS	8C	EXCLUDE
Embr_Limb_14dpc	Mid_Embr	OTHERS		EXCLUDE	Embr	EXCLUDE
Embr_Liver_14dpc	Mid_Embr	OTHERS		OTHERS	Embr	EXCLUDE
FatPad_MammGland	Adipose	OTHERS	Adipose	OTHERS	Adipose	OTHERS
Kidney_B12	Kidney	OTHERS	Kidney	OTHERS	Kidney	OTHERS
Kidney_ENP	Kidney	OTHERS	Kidney	OTHERS	Kidney	OTHERS
Liver_B12	Liver	OTHERS	Liver	OTHERS	Liver	OTHERS
Liver_ENP	Liver	OTHERS	Liver	OTHERS	Liver	OTHERS
Lung_M		OTHERS		OTHERS		OTHERS
MEF_bc	Fibroblast	OTHERS	Fibroblast	OTHERS	Fibroblast	OTHERS
MEFa	Fibroblast	OTHERS	Fibroblast	OTHERS	Fibroblast	OTHERS
Myobl120h		OTHERS		EXCLUDE		OTHERS
Myobl168h		OTHERS		EXCLUDE		OTHERS
Myobl60h		OTHERS		EXCLUDE		OTHERS
Myoblm24h	C2C12	OTHERS	C2C12	EXCLUDE	C2C12	OTHERS
C2C12_cont	C2C12	OTHERS	C2C12	EXCLUDE	C2C12	OTHERS
OvaryE		OTHERS		OTHERS		OTHERS
pB_T_cells		OTHERS		OTHERS		OTHERS
PGC_E13dpc	PGC	OTHERS	PGC	OTHERS	PGC	EXCLUDE
PGC_E9_E11dpc	PGC	OTHERS	PGC	OTHERS	PGC	EXCLUDE
Placenta	Placenta	OTHERS	Placenta	OTHERS	Placenta	OTHERS
PlacentaE	Placenta	OTHERS	Placenta	OTHERS	Placenta	OTHERS
Spleen_M		OTHERS		OTHERS		OTHERS
Colon_M	DigestiveTube	OTHERS	DigestiveTube	OTHERS	DigestiveTube	OTHERS
Intestine_M	DigestiveTube	OTHERS	DigestiveTube	OTHERS	DigestiveTube	OTHERS
StomachE	DigestiveTube	OTHERS	DigestiveTube	OTHERS	DigestiveTube	OTHERS
Testis_B12	Testis	OTHERS	Testis	OTHERS	Testis	OTHERS
Testis_EP	Testis	OTHERS	Testis	OTHERS	Testis	OTHERS
ThymusE		OTHERS		OTHERS		OTHERS
TSb		OTHERS		OTHERS		EXCLUDE
PREC_NPCa	NPC	EXCLUDE	NPC	OTHERS	NPC	EXCLUDE
PREC_NPCb	NPC	EXCLUDE	NPC	OTHERS	NPC	EXCLUDE
PREC_VZ	NPC	EXCLUDE	NPC	OTHERS	NPC	EXCLUDE
CL_N2A	N2A	EXCLUDE	N2A	OTHERS	N2A	OTHERS
CL_N2A_nSR100_Cont	N2A	EXCLUDE	N2A	OTHERS	N2A	OTHERS
Embr_Brain_CNS_11dpc	Embr_Neural	EXCLUDE	Embr_Neural	OTHERS	Embr	EXCLUDE
Embr_Brain_CNS_14dpc	Embr_Neural	EXCLUDE	Embr_Neural	OTHERS	Embr	EXCLUDE
Embr_Brain_Cortex_E17	Embr_Neural	EXCLUDE	Embr_Neural	OTHERS	Embr	EXCLUDE
	28		23		24
